# Supplementary material for: Stokes flow singularity at a corner joining solid and porous walls at arbitrary angle
Source: Springer Nature journal article supplement (doi:10.1007/s10665-017-9901-2), 2017-05-25
Supplement: MOESM1 [file 12315058]

## Supplementary Material

The following Fortran 2003 code should be copied into a text editor window and saved under the filename “library.f95” in the same directory as the calling program (e.g., the sample program from Appendix C).

```

#####
! Copyright 2013 by Ludwig C. Nitsche
!-----
module mod_constants
implicit none
integer, parameter :: DP = selected_real_kind(15,307)
real(DP), parameter :: PI = 3.14159265358979324_DP
end module mod_constants
#####
! Copyright 2013 by Ludwig C. Nitsche
!-----
module mod_utilities
use mod_constants
implicit none
private
public :: clip
public :: sgn
public :: det2
public :: det3
public :: det4
public :: angle
public :: numChar
public :: PolarToCartesian
public :: CartesianToPolar
public :: LatexSciNotation
public :: FiniteDifference
interface clip
  module procedure iclip
  module procedure dclip
end interface clip
interface sgn
  module procedure isgn
  module procedure dsgn
end interface sgn
contains
=====
  elemental function iclip (i,j,k) result (m)
  implicit none
  integer, intent(in) :: i, j, k
  integer :: m
  if (i < j) then
    m = j
  else if (i > k) then
    m = k
  else
    m = i
  end if
end function iclip
=====
  elemental function dclip (x,y,z) result (f)
  implicit none
  real(DP), intent(in) :: x, y, z
  real(DP) :: f

```

```

if (x < y) then
  f = y
else if (x > z) then
  f = z
else
  f = x
end if
end function dclip

```

```

=====

```

```

function isgn(i) result(j)
implicit none
integer, intent(in) :: i
integer              :: j
if (i > 0) then
  j = 1
else if (i < 0) then
  j = -1
else
  j = 0
end if
end function isgn

```

```

=====

```

```

function dsgn(x) result(f)
implicit none
real(DP), intent(in) :: x
real(DP)              :: f
real(DP), parameter  :: tol = 1.0e-8_DP
if (x > tol) then
  f = 1.0_DP
else if (x < -tol) then
  f = -1.0_DP
else
  f = 0.0_DP
end if
end function dsgn

```

```

=====

```

```

function det2(arg_a) result(arg_det)
real(DP), dimension(2,2), intent(in) :: arg_a
real(DP)                             :: arg_det
arg_det = arg_a(1,1) * arg_a(2,2) - arg_a(1,2) * arg_a(2,1)
end function det2

```

```

=====

```

```

function det3(arg_a) result(arg_det)
real(DP), dimension(3,3), intent(in) :: arg_a
real(DP)                             :: arg_det
arg_det =  arg_a(1,1) * arg_a(2,2) * arg_a(3,3) &
+ arg_a(1,3) * arg_a(2,1) * arg_a(3,2) &
+ arg_a(1,2) * arg_a(2,3) * arg_a(3,1) &
- arg_a(1,1) * arg_a(2,3) * arg_a(3,2) &
- arg_a(1,2) * arg_a(2,1) * arg_a(3,3) &
- arg_a(1,3) * arg_a(2,2) * arg_a(3,1)
end function det3

```

```

=====

```

```

function det4(arg_a) result(arg_det)
real(DP), dimension(4,4), intent(in) :: arg_a
real(DP)                             :: arg_det
real(DP), dimension(4,3,3)           :: b
integer                              :: j
b(1, :, :) = arg_a(2:4, 2:4)
b(4, :, :) = arg_a(2:4, 1:3)

```

```

b(2,:,1) = arg_a(2:4,1)
b(3,:,3) = arg_a(2:4,4)
b(2,:,2:3) = arg_a(2:4,3:4)
b(3,:,1:2) = arg_a(2:4,1:2)
arg_det = 0.0_DP
do j = 1, 4
  arg_det = arg_det + arg_a(1,j) * real((-1)**j,DP) * det3(b(j,,:))
end do
end function det4
=====
function angle(r) result(a)
implicit none
real(DP), dimension(2), intent(in) :: r
real(DP) :: a, d
d = sqrt(r(1)**2 + r(2)**2)
if (d < 1.0e-9_DP) then
  a = 0.0d0
else if (r(2) >= 0.0_DP) then
  a = acos(r(1) / d)
else
  a = 2.0d0 * pi - acos(r(1) / d)
end if
end function angle
=====
subroutine PolarToCartesian (t,vr,vt,vx,vy)
implicit none
real(DP), intent(in) :: t, vr, vt
real(DP), intent(out) :: vx, vy
vx = vr * cos(t) - vt * sin(t)
vy = vr * sin(t) + vt * cos(t)
end subroutine PolarToCartesian
=====
subroutine CartesianToPolar (t,vx,vy,vr,vt)
implicit none
real(DP), intent(in) :: t, vx, vy
real(DP), intent(out) :: vr, vt
vr = vx * cos(t) + vy * sin(t)
vt = -vx * sin(t) + vy * cos(t)
end subroutine CartesianToPolar
=====
subroutine numChar(arg_n,arg_name)
implicit none
character(len=8) :: long
character(len=*), intent(out) :: arg_name
integer, intent(in) :: arg_n
integer :: i, m
if (len(arg_name) > 8) then
  print*, 'Error 1 in {numChar}'
  stop
end if
m = 0
do i = 0, len(arg_name) - 1
  m = m + 9 * 10**i
end do
if (arg_n < 0 .or. arg_n > m) then
  print*, 'Error 2 in {numChar}'
  stop
end if
write (long,100) arg_n
arg_name = long(9-len(arg_name):8)

```

```

100 format (i8.8)
end subroutine numChar
!=====
function LatexSciNotation(arg_x) result(arg_latex)
real(DP), intent(in) :: arg_x
character(len=53)    :: arg_latex
character(len=13)    :: mantis
character(len=23)    :: sign_mantis
character(len=1)     :: charac, sign_charac
real(DP)             :: y, z
integer              :: m
real(DP), parameter  :: tol = 1.0e-12_DP
if (arg_x < 0.0) then
    sign_mantis = '-'
else
    sign_mantis = '\mbox{} \hspace{0.114in}'
end if
if (abs(arg_x) < tol) then
    arg_latex = ''
else
    y = log10(abs(arg_x))
    if (y < 0.0) then
        m = int(y) - 1
    else
        m = int(y)
    end if
    if (m < 0) then
        sign_charac = '-'
    else
        sign_charac = ''
    end if
    z = abs(arg_x) / 10.0**m
    write (mantis,100) z
    call numChar(abs(m),charac)
    arg_latex = '$' // sign_mantis // mantis // ' \times 10^{'} &
                // sign_charac // charac // '}$'
end if
100 format(f13.11)
end function LatexSciNotation
!=====
function FiniteDifference(arg_x,arg_k,arg_h,func) result(arg_f)
integer, intent(in) :: arg_k
real(DP), intent(in) :: arg_x
real(DP), intent(in) :: arg_h
real(DP)              :: arg_f
interface
    function func(dum_x) result(dum_f)
        use mod_constants
        real(DP), intent(in) :: dum_x
        real(DP)              :: dum_f
    end function func
end interface
select case(arg_k)
case(0)
    arg_f = func(arg_x)
case(1)
    arg_f = (func(arg_x + arg_h) - func(arg_x - arg_h)) / (2.0_DP * arg_h)
case(2)
    arg_f = (func(arg_x + arg_h) - 2.0_DP * func(arg_x) + func(arg_x - arg_h)) / arg_h**2
case default

```

```

        arg_f = 0.0_DP
    end select
end function FiniteDifference
!=====
end module mod_utilities
!#####
! Copyright 2013 by Ludwig C. Nitsche
!-----
module mod_fullmat
use mod_constants
implicit none
type, public :: typ_fullmat
    private
    integer                :: n
    integer, dimension(:), allocatable :: i
    real(DP), dimension(:,,:), allocatable :: a
    real(DP)                :: det
contains
    procedure :: setMatrix => fullmat_setMatrix
    procedure :: solSystem => fullmat_solSystem
    procedure :: getDeterm => fullmat_getDeterm
end type typ_fullmat
private :: fullmat_setMatrix
private :: fullmat_solSystem
private :: fullmat_getDeterm
contains
!=====
    subroutine fullmat_setMatrix(this,arg_a)
    class(typ_fullmat),      intent(inout) :: this
    real(DP), dimension(:,,:), intent(in)   :: arg_a
    real(DP), dimension(:,,:), allocatable  :: u
    integer                  :: i, k
    integer,                  parameter     :: nCut = 0
    if (size(arg_a,1) /= size(arg_a,2)) then
        print*, 'Error in {fullmat_setMatrix}'
        print*, 'Matrix is not square'
        stop
    end if
    this%n = size(arg_a,1)
    if (allocated(this%a)) then
        deallocate(this%a)
    end if
    if (allocated(this%i)) then
        deallocate(this%i)
    end if
    allocate(this%a(this%n,this%n))
    allocate(this%i(this%n))
    this%a = arg_a
    do i = 1, this%n
        this%i(i) = i
    end do
    if (this%n <= nCut) then
        allocate(u(this%n,this%n))
        u = this%a
    end if
    do i = 1, this%n - 1
        call fullmat_pivot(this,i)
        do k = i + 1, this%n
            this%a(this%i(k),i) = this%a(this%i(k),i) / this%a(this%i(i),i)
            this%a(this%i(k),i+1:this%n) = this%a(this%i(k),i+1:this%n) &

```

```

                                - this%a(this%i(k),i) * this%a(this%i(i),i+1:this%n)
    if (this%n <= nCut) then
        u(this%i(k,:) = u(this%i(k,:) - this%a(this%i(k),i) * u(this%i(i),:)
    end if
end do
if (this%n <= nCut) then
    print 100, i
    call fullmat_print_matrix(u)
    print*
end if
end do
this%det = 1.0_DP
do i = 1, this%n
    this%det = this%det * this%a(this%i(i),i)
end do
100 format('Gaussian elimination - pass: ', i1)
end subroutine fullmat_setMatrix
!=====
subroutine fullmat_solSystem(this,arg_v)
class(typ_fullmat),      intent(in)      :: this
real(DP), dimension(:), intent(inout)    :: arg_v
real(DP), dimension(:), allocatable     :: x
integer                  :: i, j
allocate(x(this%n))
do i = 1, this%n
    x(this%i(i)) = arg_v(this%i(i))
    do j = 1, i - 1
        x(this%i(i)) = x(this%i(i)) - this%a(this%i(i),j) * x(this%i(j))
    end do
end do
do i = this%n, 1, -1
    arg_v(i) = x(this%i(i))
    do j = i + 1, this%n
        arg_v(i) = arg_v(i) - this%a(this%i(i),j) * arg_v(j)
    end do
    arg_v(i) = arg_v(i) / this%a(this%i(i),i)
end do
deallocate(x)
end subroutine fullmat_solSystem
!=====
function fullmat_getDeterm(this) result(arg_det)
class(typ_fullmat),      intent(in)      :: this
real(DP)                 :: arg_det
arg_det = this%det
end function fullmat_getDeterm
!=====
subroutine fullmat_pivot(this,arg_i)
class(typ_fullmat), intent(inout) :: this
integer,            intent(in)     :: arg_i
real(DP)           :: maxVal
integer            :: k, m, iTemp
m = 0
maxVal = 0.0_DP
do k = arg_i, this%n
    if (abs(this%a(this%i(k),arg_i)) > maxVal) then
        m = k
        maxVal = abs(this%a(this%i(k),arg_i))
    end if
end do
end do
iTemp = this%i(arg_i)

```

```

    this%i(arg_i) = this%i(m)
    this%i(m) = iTemp
    end subroutine fullmat_pivot
!=====
    subroutine fullmat_print_matrix(arg_a)
    real(DP), dimension(:,:), intent(in) :: arg_a
    integer :: i
    do i = 1, size(arg_a,1)
        print 100, arg_a(i,:)
    end do
100 format(10(1x, f10.5))
    end subroutine fullmat_print_matrix
!=====
end module mod_fullmat
#####
! Copyright 2013 by Ludwig C. Nitsche
!-----
module mod_stokesEq2d
use mod_constants
use mod_utilities
implicit none
save
private
public :: stokesEq2d_Cartesian
public :: stokesEq2d_Polar
contains
!=====
    subroutine stokesEq2d_Cartesian(sub,filename)
    implicit none
    character(len=*), intent(in) :: filename
    integer :: j, jMax
    real(DP) :: a, b, h, x, xInc, xMin, xMax
    real(DP), dimension(2) :: p, q, pMin, pMax
    real(DP), dimension(4) :: e
    real(DP) :: eMax
    interface
        subroutine sub(dum_r,dum_f)
            use mod_constants
            real(DP), dimension(2), intent(in) :: dum_r
            real(DP), dimension(0:3), intent(out) :: dum_f
        end subroutine sub
    end interface
    eMax = 0.0_DP
    open(unit = 30, file = filename)
    h = 1.0e-4_DP
    pMin(1) = -2.0_DP
    pMax(1) = 2.0_DP
    pMin(2) = 0.2_DP
    pMax(2) = 4.0_DP
    jMax = 12
    write(30,100) h
    do j = 1, jMax
        call random_number(q)
        p = pMin + (pMax - pMin) * q
        call stokesEq2d_CartesianPoint(sub,h,p,e)
        write(30,200) p, abs(e)
        if (maxval(abs(e)) > eMax) then
            eMax = maxval(abs(e))
        end if
    end do
end do

```

```

xInc = 0.2_DP
xMin = 1.2_DP
xMax = 4.0_DP
jMax = nint((xMax - xMin) / xInc)
write(30,300) h
do j = 0, jMax
  x = xMin + (xMax - xMin) * dble(j) / dble(jMax)
  call stokesEq2d_CartesianShear(sub,h,x,a,b)
  write(30,400) x, a, b, b / a - 1.0_DP
  if (abs(b / a - 1.0_DP) > eMax) then
    eMax = abs(b / a - 1.0_DP)
  end if
end do
write(30,500) eMax
close(30)
100 format (/ 'Finite-difference check of the Stokes equations' / &
  'Relative errors (Cartesian coordinates)' / &
  'Step size: h = ', d8.2 // &
  2x, 'position-x', 2x, 'position-y', 2x, 'momentum-x', &
  2x, 'momentum-y', 2x, 'harmonic-p', 2x, 'continuity' / &
  6(2x, 10(' ')))
200 format (6(2x, d10.3))
300 format (/ 'Finite-difference check of the shear stress' / &
  '(Cartesian coordinates)' / 'Step size: h = ', d8.2 // &
  2x, '          x', 16x, ' analytical', &
  2x, ' numerical', 2x, ' difference' / &
  2x, 12(' '), 14x, 3(2x, 12(' ')))
400 format (2x, d12.5, 14x, 3(2x, d12.5))
500 format(/ 'Maximum relative error: ', e12.5)
end subroutine stokesEq2d_Cartesian
!=====
subroutine stokesEq2d_CartesianPoint(sub,arg_h,arg_p,arg_e)
implicit none
integer                :: i, j
real(DP),              intent(in)  :: arg_h
real(DP), dimension(2), intent(in)  :: arg_p
real(DP), dimension(4), intent(out) :: arg_e
real(DP), dimension(2,-1:1,-1:1)  :: p
real(DP), dimension(0:3,-1:1,-1:1) :: f
real(DP), dimension(2)             :: grd_pressure, lap_velocity
real(DP)                         :: lap_pressure, div_velocity
real(DP)                           :: pr_xx, vx_x
real(DP)                           :: err_momentum_x, err_momentum_y
real(DP)                           :: err_laplacianp, err_continuity
interface
  subroutine sub(dum_r,dum_f)
    use mod_constants
    real(DP), dimension(2),  intent(in)  :: dum_r
    real(DP), dimension(0:3), intent(out) :: dum_f
  end subroutine sub
end interface
do i = -1, 1
do j = -1, 1
  p(:,i,j) = arg_p + arg_h * (/ dble(i), dble(j) /)
  call sub(p(:,i,j),f(:,i,j))
end do
end do
grd_pressure(1) = (f(0,1,0) - f(0,-1,0)) / (2.0_DP * arg_h)
grd_pressure(2) = (f(0,0,1) - f(0,0,-1)) / (2.0_DP * arg_h)
lap_velocity(1) = (f(1,1,0) + f(1,-1,0) + f(1,0,1) + f(1,0,-1) - 4.0_DP * f(1,0,0)) / arg_h**2

```



```

lap_velocity(2) = (f(2,1,0) + f(2,-1,0) + f(2,0,1) + f(2,0,-1) - 4.0_DP * f(2,0,0)) / arg_h**2
lap_pressure   = (f(0,1,0) + f(0,-1,0) + f(0,0,1) + f(0,0,-1) - 4.0_DP * f(0,0,0)) / arg_h**2
div_velocity   = (f(1,1,0) - f(1,-1,0) + f(2,0,1) - f(2,0,-1)) / (2.0_DP * arg_h)
vx_x           = (f(1,1,0) - f(1,-1,0)) / (2.0_DP * arg_h)
pr_xx         = (f(0,1,0) + f(0,-1,0) - 2.0_DP * f(0,0,0)) / arg_h**2
err_momentum_x = abs((grd_pressure(1) - lap_velocity(1)) / grd_pressure(1))
err_momentum_y = abs((grd_pressure(2) - lap_velocity(2)) / grd_pressure(2))
err_laplacianp = abs(lap_pressure / pr_xx)
err_continuity = abs(div_velocity / vx_x)
arg_e(1) = err_momentum_x
arg_e(2) = err_momentum_y
arg_e(3) = err_laplacianp
arg_e(4) = err_continuity
end subroutine stokesEq2d_CartesianPoint
!=====
subroutine stokesEq2d_CartesianShear(sub,arg_h,arg_x,arg_a,arg_b)
implicit none
integer                :: i, j
real(DP), intent(in)  :: arg_h, arg_x
real(DP), intent(out) :: arg_a, arg_b
real(DP), dimension(2) :: r
real(DP), dimension(0:3,-1:1,0:2) :: f
real(DP)               :: vx_y, vy_x
interface
  subroutine sub(dum_r,dum_f)
    use mod_constants
    real(DP), dimension(2), intent(in) :: dum_r
    real(DP), dimension(0:3), intent(out) :: dum_f
  end subroutine sub
end interface
do i = -1, 1
do j = 0, 2
  r(1) = dble(i) * arg_h + arg_x
  r(2) = dble(j) * arg_h
  call sub(r,f(:,i,j))
end do
end do
vx_y = (-3.0_DP * f(1,0,0) + 4.0_DP * f(1,0,1) - f(1,0,2)) / (2.0_DP * arg_h)
vy_x = (f(2,1,0) - f(2,-1,0)) / (2.0_DP * arg_h)
arg_a = f(3,0,0)
arg_b = vx_y + vy_x
end subroutine stokesEq2d_CartesianShear
!=====
subroutine stokesEq2d_Polar(sub,filename)
implicit none
character(len=*), intent(in) :: filename
integer                :: i, iMax, j, jMax
real(DP)               :: a, b, h, q, r, s, t
real(DP)               :: rInc, rMin, rMax
real(DP)               :: tInc, tMin, tMax
real(DP)               :: eMax
real(DP), dimension(4) :: e
interface
  subroutine sub(dum_r,dum_t,dum_pr,dum_vr,dum_vt,dum_st)
    use mod_constants
    real(DP), intent(in) :: dum_r, dum_t
    real(DP), intent(out) :: dum_pr, dum_vr, dum_vt, dum_st
  end subroutine sub
end interface
eMax = 0.0_DP

```

```

open(unit = 30, file = filename)
h = 1.0e-4_DP
rMin = 0.2_DP
rMax = 5.0_DP
tMin = 0.0_DP
tMax = pi
jMax = 12
write(30,100) h
do j = 1, jMax
  call random_number(q)
  call random_number(s)
  r = rMin + (rMax - rMin) * q
  t = tMin + (tMax - tMin) * s
  call stokesEq2d_PolarPoint(sub,h,r,t,e)
  write(30,200) r, t, abs(e)
  if (maxval(abs(e)) > eMax) then
    eMax = maxval(abs(e))
  end if
end do
rInc = 0.2_DP
rMin = 1.2_DP
rMax = 4.0_DP
tInc = pi / 6.0_DP
tMin = 0.0_DP
tMax = pi / 3.0_DP
iMax = nint((tMax - tMin) / tInc)
jMax = nint((rMax - rMin) / rInc)
write(30,300) h
do i = 0, iMax
do j = 0, jMax
  t = tMin + (tMax - tMin) * dble(i) / dble(iMax)
  r = rMin + (rMax - rMin) * dble(j) / dble(jMax)
  call stokesEq2d_PolarShear(sub,h,r,t,a,b)
  write(30,400) r, t, a, b, b / a - 1.0_DP
  if (abs(b / a - 1.0_DP) > eMax) then
    eMax = abs(b / a - 1.0_DP)
  end if
end do
end do
write(30,500) eMax
close(30)
100 format (/ 'Finite-difference check of the Stokes equations' / &
  'Relative errors (polar coordinates)' / &
  'Step size in r: h = ', d8.2 // &
  2x, 'position-r', 2x, 'position-t', 2x, 'momentum-r', &
  2x, 'momentum-t', 2x, 'harmonic-p', 2x, 'continuity' / &
  6(2x, 10('-')))
200 format (6(2x, d10.3))
300 format (/ 'Finite-difference check of the shear stress' / &
  '(Polar coordinates)' / 'Step size: h = ', d8.2 // &
  2x, ' r', 2x, ' t', &
  2x, ' analytical', 2x, ' numerical', &
  2x, ' difference' / 5(2x, 12('-')))
400 format (5(2x, d12.5))
500 format(/ 'Maximum relative error: ', e12.5)
end subroutine stokesEq2d_Polar
!=====
subroutine stokesEq2d_PolarPoint(sub,arg_h,arg_r,arg_t,arg_e)
implicit none
integer :: i, j

```

```

real(DP),          intent(in)  :: arg_h, arg_r, arg_t
real(DP), dimension(4), intent(out) :: arg_e
real(DP), dimension(-1:1)      :: r, t
real(DP), dimension(-1:1,-1:1) :: pr, vr, vt, st
real(DP)               :: pr_r, pr_rr, pr_t, pr_tt
real(DP)               :: vr_r, vr_rr, vr_t, vr_tt
real(DP)               :: vt_r, vt_rr, vt_t, vt_tt
real(DP)               :: hr, ht
real(DP)               :: lap_pressure, div_velocity
real(DP)               :: lhs_momentum_r, lhs_momentum_t
real(DP)               :: rhs_momentum_r, rhs_momentum_t
real(DP)               :: err_momentum_r, err_momentum_t
real(DP)               :: err_laplacianp, err_continuity
real(DP), parameter     :: par_tol = 1.0d-6
interface
  subroutine sub (dum_r,dum_t,dum_pr,dum_vr,dum_vt,dum_st)
    use mod_constants
    real(DP), intent(in)  :: dum_r, dum_t
    real(DP), intent(out) :: dum_pr, dum_vr, dum_vt, dum_st
  end subroutine sub
end interface
if (arg_r < par_tol) then
  print*, 'Error 1 in {stokesEq2d_PolarPoint}'
  stop
end if
r = 0.0_DP
t = 0.0_DP
pr = 0.0_DP
vr = 0.0_DP
vt = 0.0_DP
hr = arg_h
ht = arg_h / arg_r
do i = -1, 1
  r(i) = arg_r + dble(i) * hr
  t(i) = arg_t + dble(i) * ht
end do
do i = -1, 1
do j = -1, 1
  call sub(r(i),t(j),pr(i,j),vr(i,j),vt(i,j),st(i,j))
end do
end do
pr_r = (pr(1,0) - pr(-1,0)) / (2.0_DP * hr)
vr_r = (vr(1,0) - vr(-1,0)) / (2.0_DP * hr)
vt_r = (vt(1,0) - vt(-1,0)) / (2.0_DP * hr)
pr_t = (pr(0,1) - pr(0,-1)) / (2.0_DP * ht)
vr_t = (vr(0,1) - vr(0,-1)) / (2.0_DP * ht)
vt_t = (vt(0,1) - vt(0,-1)) / (2.0_DP * ht)
pr_rr = (pr(1,0) - 2.0_DP * pr(0,0) + pr(-1,0)) / hr**2
vr_rr = (vr(1,0) - 2.0_DP * vr(0,0) + vr(-1,0)) / hr**2
vt_rr = (vt(1,0) - 2.0_DP * vt(0,0) + vt(-1,0)) / hr**2
pr_tt = (pr(0,1) - 2.0_DP * pr(0,0) + pr(0,-1)) / ht**2
vr_tt = (vr(0,1) - 2.0_DP * vr(0,0) + vr(0,-1)) / ht**2
vt_tt = (vt(0,1) - 2.0_DP * vt(0,0) + vt(0,-1)) / ht**2
div_velocity = vr_r + vr(0,0) / r(0) + vt_t / r(0)
lap_pressure = pr_rr + pr_r / r(0) + pr_tt / r(0)**2
lhs_momentum_r = pr_r
rhs_momentum_r = vr_rr + vr_r / r(0) - vr(0,0) / r(0)**2 + (vr_tt - 2.0_DP * vt_t) / r(0)**2
lhs_momentum_t = pr_t / r(0)
rhs_momentum_t = vt_rr + vt_r / r(0) - vt(0,0) / r(0)**2 + (vt_tt + 2.0_DP * vr_t) / r(0)**2
err_momentum_r = abs((lhs_momentum_r - rhs_momentum_r) / lhs_momentum_r)

```

```

err_momentum_t = abs((lhs_momentum_t - rhs_momentum_t) / lhs_momentum_t)
err_laplacianp = abs(lap_pressure * r(0)**2 / pr_tt)
err_continuity = abs(div_velocity / (vr(0,0) / r(0)))
arg_e(1) = err_momentum_r
arg_e(2) = err_momentum_t
arg_e(3) = err_laplacianp
arg_e(4) = err_continuity
end subroutine stokesEq2d_PolarPoint
!=====
subroutine stokesEq2d_PolarShear(sub,arg_h,arg_r,arg_t,arg_a,arg_b)
implicit none
integer                :: i, j
real(DP), intent(in)   :: arg_h, arg_r, arg_t
real(DP), intent(out)  :: arg_a, arg_b
real(DP)               :: r, t, ur_t, ut_r, ut
real(DP), dimension(-1:1,-1:2) :: pr, vr, vt, st
interface
  subroutine sub (dum_r,dum_t,dum_pr,dum_vr,dum_vt,dum_st)
    use mod_constants
    real(DP), intent(in) :: dum_r, dum_t
    real(DP), intent(out) :: dum_pr, dum_vr, dum_vt, dum_st
  end subroutine sub
end interface
do i = -1, 1
do j = -1, 2
  r = dble(i) * arg_h + arg_r
  t = dble(j) * arg_h + arg_t
  call sub(r,t,pr(i,j),vr(i,j),vt(i,j),st(i,j))
end do
end do
ut = vt(0,0)
ur_t = (vr(0,1) - vr(0,-1)) / (2.0_DP * arg_h)
! ur_t = (-3.0_DP * vr(0,0) + 4.0_DP * vr(0,1) - vr(0,2)) / (2.0_DP * arg_h)
ut_r = (vt(1,0) - vt(-1,0)) / (2.0_DP * arg_h)
arg_a = st(0,0)
arg_b = ut_r + (ur_t - ut) / arg_r
end subroutine stokesEq2d_PolarShear
!=====
end module mod_stokesEq2d
!#####
! Copyright 2013 by Ludwig C. Nitsche
!-----
module mod_generalSolutionPlus1
use mod_constants
use mod_utilities
use mod_stokesEq2d
implicit none
private
public :: generalSolutionPlus1_SetAngle
public :: generalSolutionPlus1_Coeff_p
public :: generalSolutionPlus1_Coeff_r
public :: generalSolutionPlus1_Coeff_t
public :: generalSolutionPlus1_Coeff_s
public :: generalSolutionPlus1_Cartesian
public :: generalSolutionPlus1_Polar
public :: generalSolutionPlus1_Check
public :: generalSolutionPlus1_Boundary
real(DP)                :: sav_theta = PI / 2.0_DP
real(DP), dimension(10) :: sav_d
contains

```

```

=====
subroutine generalSolutionPlus1_SetAngle(angle)
implicit none
integer, intent(in) :: angle
sav_theta = real(angle,DP) * PI / 180.0_DP
end subroutine generalSolutionPlus1_SetAngle
=====
subroutine generalSolutionPlus1_Coeff_p(t,fp0,fp1,fp2)
implicit none
real(DP),          intent(in)  :: t
real(DP), dimension(10), intent(out) :: fp0, fp1, fp2
fp0 = 0.0_DP
fp1 = 0.0_DP
fp2 = 0.0_DP
!
fp2(4) = -4.0_DP / 3.0_DP
!
fp0( 3) = 8.0_DP * t
fp0( 4) = 4.0_DP * t**2 + 8.0_DP
fp0(10) = -4.0_DP
end subroutine generalSolutionPlus1_Coeff_p
=====
subroutine generalSolutionPlus1_Coeff_r(t,fr0,fr1,fr2)
implicit none
real(DP),          intent(in)  :: t
real(DP), dimension(10), intent(out) :: fr0, fr1, fr2
real(DP)           :: c, s
c = cos(2 * t)
s = sin(2 * t)
fr0 = 0.0_DP
fr1 = 0.0_DP
fr2 = 0.0_DP
!
fr2(1) = 2.0_DP * s
fr2(2) = -2.0_DP * c
fr2(4) = -1.0_DP
!
fr1(1) = 4.0_DP * t * c + 2.0_DP * s
fr1(2) = 4.0_DP * t * s - 2.0_DP * c
fr1(4) = 2.0_DP
fr1(5) = 2.0_DP * s
fr1(6) = -2.0_DP * c
!
fr0( 1) = -2.0_DP * t**2 * s + 2.0_DP * t * c
fr0( 2) = 2.0_DP * t**2 * c + 2.0_DP * t * s
fr0( 3) = 2.0_DP * t
fr0( 4) = t**2
fr0( 5) = 2.0_DP * t * c + s
fr0( 6) = 2.0_DP * t * s - c
fr0( 7) = 2.0_DP * s
fr0( 8) = -2.0_DP * c
fr0( 9) = 0.0_DP
fr0(10) = -1.0_DP
end subroutine generalSolutionPlus1_Coeff_r
=====
subroutine generalSolutionPlus1_Coeff_t(t,ft0,ft1,ft2)
implicit none
real(DP),          intent(in)  :: t
real(DP), dimension(10), intent(out) :: ft0, ft1, ft2
real(DP)           :: c, s

```

```

c = cos(2 * t)
s = sin(2 * t)
ft0 = 0.0_DP
ft1 = 0.0_DP
ft2 = 0.0_DP
!
ft2(1) = 2.0_DP * c
ft2(2) = 2.0_DP * s
ft2(3) = 2.0_DP
ft2(4) = 2.0_DP * t
!
ft1(1) = -4.0_DP * t * s + 2.0_DP * c
ft1(2) = 4.0_DP * t * c + 2.0_DP * s
ft1(3) = -2.0_DP
ft1(4) = -2.0_DP * t
ft1(5) = 2.0_DP * c
ft1(6) = 2.0_DP * s
!
ft0( 1) = -2.0_DP * t**2 * c - 2.0_DP * t * s
ft0( 2) = -2.0_DP * t**2 * s + 2.0_DP * t * c
ft0( 3) = -2.0_DP - 2.0_DP * t**2
ft0( 4) = -2.0_DP * t - 2.0_DP * t**3 / 3.0_DP
ft0( 5) = -2.0_DP * t * s + c
ft0( 6) = 2.0_DP * t * c + s
ft0( 7) = 2.0_DP * c
ft0( 8) = 2.0_DP * s
ft0( 9) = 2.0_DP
ft0(10) = 2.0_DP * t
end subroutine generalSolutionPlus1_Coeff_t
!=====
subroutine generalSolutionPlus1_Coeff_s(t,fs0,fs1,fs2)
implicit none
real(DP),          intent(in)  :: t
real(DP), dimension(10), intent(out) :: fs0, fs1, fs2
real(DP)           :: c, s
c = cos(2 * t)
s = sin(2 * t)
fs0 = 0.0_DP
fs1 = 0.0_DP
fs2 = 0.0_DP
!
fs2(1) = 4.0_DP * c
fs2(2) = 4.0_DP * s
!
fs1(1) = 12.0_DP * c - 8.0_DP * t * s
fs1(2) = 12.0_DP * s + 8.0_DP * t * c
fs1(3) = 4.0_DP
fs1(4) = 4.0_DP * t
fs1(5) = 4.0_DP * c
fs1(6) = 4.0_DP * s
!
fs0(1) = 4.0_DP * c - 12.0_DP * t * s - 4.0_DP * t**2 * c
fs0(2) = 4.0_DP * s + 12.0_DP * t * c - 4.0_DP * t**2 * s
fs0(5) = 6.0_DP * c - 4.0_DP * t * s
fs0(6) = 6.0_DP * s + 4.0_DP * t * c
fs0(7) = 4.0_DP * c
fs0(8) = 4.0_DP * s
end subroutine generalSolutionPlus1_Coeff_s
!=====
subroutine generalSolutionPlus1_Cartesian(d,p,f)

```

```

real(DP), dimension(10), intent(in)  :: d
real(DP), dimension(2),  intent(in)  :: p
real(DP), dimension(0:3), intent(out) :: f
real(DP)                  :: r, t, pr, vr, vt, st, vx, vy
r = sqrt(dot_product(p,p))
t = angle(p)
call generalSolutionPlus1_Polar(d,r,t,pr,vr,vt,st)
call PolarToCartesian(t,vr,vt,vx,vy)
f = (/ pr, vx, vy, st /)
end subroutine generalSolutionPlus1_Cartesian
!=====
subroutine generalSolutionPlus1_Polar(d,r,t,pr,vr,vt,st)
implicit none
real(DP), dimension(10), intent(in)  :: d
real(DP),                  intent(in)  :: r, t
real(DP),                  intent(out) :: pr, vr, vt, st
real(DP), dimension(10)      :: fs0, fs1, fs2
real(DP), dimension(10)      :: fp0, fp1, fp2
real(DP), dimension(10)      :: fr0, fr1, fr2
real(DP), dimension(10)      :: ft0, ft1, ft2
real(DP)                    :: lnr1, lnr2
lnr1 = log(r)
lnr2 = log(r)**2
!
call generalSolutionPlus1_Coeff_s(t,fs0,fs1,fs2)
call generalSolutionPlus1_Coeff_p(t,fp0,fp1,fp2)
call generalSolutionPlus1_Coeff_r(t,fr0,fr1,fr2)
call generalSolutionPlus1_Coeff_t(t,ft0,ft1,ft2)
!
pr = (dot_product(d,fp2) * lnr2 + dot_product(d,fp1) * lnr1 + dot_product(d,fp0)) * lnr1
vr = (dot_product(d,fr2) * lnr2 + dot_product(d,fr1) * lnr1 + dot_product(d,fr0)) * r
vt = (dot_product(d,ft2) * lnr2 + dot_product(d,ft1) * lnr1 + dot_product(d,ft0)) * r
st = dot_product(d,fs2) * lnr2 + dot_product(d,fs1) * lnr1 + dot_product(d,fs0)
end subroutine generalSolutionPlus1_Polar
!=====
subroutine generalSolutionPlus1_Boundary(d)
implicit none
real(DP), dimension(10), intent(in)  :: d
real(DP), dimension(10)      :: fs0, fs1, fs2
real(DP), dimension(10)      :: fp0, fp1, fp2
real(DP), dimension(10)      :: fr0, fr1, fr2
real(DP), dimension(10)      :: ft0, ft1, ft2
real(DP), dimension(10)      :: gs0, gs1, gs2
real(DP), dimension(10)      :: gp0, gp1, gp2
real(DP), dimension(10)      :: gr0, gr1, gr2
real(DP), dimension(10)      :: gt0, gt1, gt2
real(DP), dimension(10)      :: hs0, hs1, hs2
real(DP), dimension(10)      :: hp0, hp1, hp2
real(DP), dimension(10)      :: hr0, hr1, hr2
real(DP), dimension(10)      :: ht0, ht1, ht2
real(DP)                    :: t1, t2, t3
integer                      :: a1, a2, a3
t1 = 0.0_DP
t2 = sav_theta / 2.0_DP
t3 = sav_theta
a1 = nint(t1 * 180.0_DP / PI)
a2 = nint(t2 * 180.0_DP / PI)
a3 = nint(t3 * 180.0_DP / PI)
!
call generalSolutionPlus1_Coeff_s(t1,fs0,fs1,fs2)

```

```

call generalSolutionPlus1_Coeff_p(t1,fp0,fp1,fp2)
call generalSolutionPlus1_Coeff_r(t1,fr0,fr1,fr2)
call generalSolutionPlus1_Coeff_t(t1,ft0,ft1,ft2)
!
call generalSolutionPlus1_Coeff_s(t2,gs0,gs1,gs2)
call generalSolutionPlus1_Coeff_p(t2,gp0,gp1,gp2)
call generalSolutionPlus1_Coeff_r(t2,gr0,gr1,gr2)
call generalSolutionPlus1_Coeff_t(t2,gt0,gt1,gt2)
!
call generalSolutionPlus1_Coeff_s(t3,hs0,hs1,hs2)
call generalSolutionPlus1_Coeff_p(t3,hp0,hp1,hp2)
call generalSolutionPlus1_Coeff_r(t3,hr0,hr1,hr2)
call generalSolutionPlus1_Coeff_t(t3,ht0,ht1,ht2)
!
print 300
print 100, 'st', a1, dot_product(d,fs2), dot_product(d,fs1), dot_product(d,fs0), '      '
print 100, 'pr', a1, dot_product(d,fp2), dot_product(d,fp1), dot_product(d,fp0), 'ln(r)'
print 100, 'vr', a1, dot_product(d,fr2), dot_product(d,fr1), dot_product(d,fr0), 'r      '
print 100, 'vt', a1, dot_product(d,ft2), dot_product(d,ft2), dot_product(d,ft2), 'r      '
print 200
print 100, 'st', a3, dot_product(d,hs2), dot_product(d,hs1), dot_product(d,hs0), '      '
print 100, 'pr', a3, dot_product(d,hp2), dot_product(d,hp1), dot_product(d,hp0), 'ln(r)'
print 100, 'vr', a3, dot_product(d,hr2), dot_product(d,hr1), dot_product(d,hr0), 'r      '
print 100, 'vt', a3, dot_product(d,ht2), dot_product(d,ht1), dot_product(d,ht0), 'r      '
print 300
100 format (a, '(r, i3, ') = [(, f10.6, ') ln(r)^2 + (, f10.6, ') ln(r) + (, f10.6, ') ] ', a, ')')
200 format ( )
300 format (79('-'))
!
end subroutine generalSolutionPlus1_Boundary
!=====
subroutine generalSolutionPlus1_Check
implicit none
sav_d(1: 4) = (/ 1.37_DP, 5.76_DP, -6.32_DP, -7.98_DP /)
sav_d(5: 6) = (/ 4.84_DP, -4.21_DP /)
sav_d(7:10) = (/ -7.51_DP, 3.54_DP, 4.03_DP, 3.72_DP /)
call stokesEq2d_Cartesian(generalSolutionPlus1_FieldCartesian,'generalSolutionPlus1_Cartesian.txt')
call stokesEq2d_Polar(generalSolutionPlus1_FieldPolar,'generalSolutionPlus1_Polar.txt')
end subroutine generalSolutionPlus1_Check
!=====
subroutine generalSolutionPlus1_FieldCartesian(p,f)
implicit none
real(DP), dimension(2), intent(in) :: p
real(DP), dimension(0:3), intent(out) :: f
call generalSolutionPlus1_Cartesian(sav_d,p,f)
end subroutine generalSolutionPlus1_FieldCartesian
!=====
subroutine generalSolutionPlus1_FieldPolar(r,t,pr,vr,vt,st)
implicit none
real(DP), intent(in) :: r, t
real(DP), intent(out) :: pr, vr, vt, st
call generalSolutionPlus1_Polar(sav_d,r,t,pr,vr,vt,st)
end subroutine generalSolutionPlus1_FieldPolar
!=====
end module mod_generalSolutionPlus1
!#####
! Copyright 2013 by Ludwig C. Nitsche
!-----
module mod_generalSolutionMinus1
use mod_constants

```



```

use mod_utilities
use mod_stokesEq2d
implicit none
private
public :: generalSolutionMinus1_SetAngle
public :: generalSolutionMinus1_Coeff_p
public :: generalSolutionMinus1_Coeff_r
public :: generalSolutionMinus1_Coeff_t
public :: generalSolutionMinus1_Coeff_s
public :: generalSolutionMinus1_Cartesian
public :: generalSolutionMinus1_Polar
public :: generalSolutionMinus1_Check
public :: generalSolutionMinus1_Boundary
real(DP)          :: sav_theta = PI / 2.0_DP
real(DP), dimension(11) :: sav_d
contains
!=====
  subroutine generalSolutionMinus1_SetAngle(angle)
    implicit none
    integer, intent(in) :: angle
    sav_theta = real(angle,DP) * PI / 180.0_DP
  end subroutine generalSolutionMinus1_SetAngle
!=====
  subroutine generalSolutionMinus1_Coeff_p(t,fp0,fp1,fp2)
    implicit none
    real(DP)          :: s, c
    real(DP),          intent(in) :: t
    real(DP), dimension(11), intent(out) :: fp0, fp1, fp2
    real(DP), dimension(4)          :: fpa0, fpa1, fpa2, fpb0, fpb1, fpc0
    c = cos(2.0_DP * t)
    s = sin(2.0_DP * t)
    fpa2 = 0.0_DP
    fpa1 = 0.0_DP
    fpa0 = 0.0_DP
    fpb1 = 0.0_DP
    fpb0 = 0.0_DP
    fpc0 = 0.0_DP
    fpa2(1) = 4.0_DP * s
    fpa2(2) = -4.0_DP * c
    fpa1(1) = -8.0_DP * t * c - 8.0_DP * s
    fpa1(2) = -8.0_DP * t * s + 8.0_DP * c
    fpa0(1) = -4.0_DP * t**2 * s + 8.0_DP * t * c
    fpa0(2) = 4.0_DP * t**2 * c + 8.0_DP * t * s
    fpb0(1) = -4.0_DP * t * c - 4.0_DP * s
    fpb0(2) = -4.0_DP * t * s + 4.0_DP * c
    fpb1 = fpa2
    fpc0 = fpa2
    fp0 = 0.0_DP
    fp1 = 0.0_DP
    fp2 = 0.0_DP
    fp2(1: 4) = fpa2
    fp1(1: 4) = fpa1
    fp1(5: 8) = fpb1
    fp0(1: 4) = fpa0
    fp0(5: 8) = fpb0
    fp0( 9) = fpc0(1)
    fp0(10) = fpc0(2)
    fp0(11) = fpc0(4)
  end subroutine generalSolutionMinus1_Coeff_p
!=====

```

```

subroutine generalSolutionMinus1_Coeff_r(t,fr0,fr1,fr2)
implicit none
real(DP)                                :: s, c
real(DP),                                intent(in)  :: t
real(DP), dimension(11), intent(out) :: fr0, fr1, fr2
real(DP), dimension(4)                  :: fra0, fra1, fra2, frb0, frb1, frc0
c = cos(2.0_DP * t)
s = sin(2.0_DP * t)
fra2 = 0.0_DP
fra1 = 0.0_DP
fra0 = 0.0_DP
frb1 = 0.0_DP
frb0 = 0.0_DP
frc0 = 0.0_DP
fra2(1) = 2.0_DP * s
fra2(2) = -2.0_DP * c
fra2(4) = -1.0_DP
fra1(1) = -4.0_DP * t * c - 2.0_DP * s
fra1(2) = -4.0_DP * t * s + 2.0_DP * c
fra0(1) = -2.0_DP * t**2 * s + 2.0_DP * t * c
fra0(2) = 2.0_DP * t**2 * c + 2.0_DP * t * s
fra0(3) = 2.0_DP * t
fra0(4) = t**2
frb0(1) = -2.0_DP * t * c - s
frb0(2) = -2.0_DP * t * s + c
frb1 = fra2
frc0 = fra2
fr0 = 0.0_DP
fr1 = 0.0_DP
fr2 = 0.0_DP
fr2(1: 4) = fra2
fr1(1: 4) = fra1
fr1(5: 8) = frb1
fr0(1: 4) = fra0
fr0(5: 8) = frb0
fr0( 9) = frc0(1)
fr0(10) = frc0(2)
fr0(11) = frc0(4)
end subroutine generalSolutionMinus1_Coeff_r

```

```

=====
subroutine generalSolutionMinus1_Coeff_t(t,ft0,ft1,ft2)
implicit none
real(DP)                                :: s, c
real(DP),                                intent(in)  :: t
real(DP), dimension(11), intent(out) :: ft0, ft1, ft2
real(DP), dimension(4)                  :: fta0, fta1, fta2, ftb0, ftb1, ftc0
c = cos(2.0_DP * t)
s = sin(2.0_DP * t)
fta2 = 0.0_DP
fta1 = 0.0_DP
fta0 = 0.0_DP
ftb1 = 0.0_DP
ftb0 = 0.0_DP
ftc0 = 0.0_DP
fta1(1) = 2.0_DP * c
fta1(2) = 2.0_DP * s
fta1(3) = 2.0_DP
fta1(4) = 2.0_DP * t
fta0(1) = 2.0_DP * t * s
fta0(2) = -2.0_DP * t * c

```

```

ftb0(1) = c
ftb0(2) = s
ftb0(3) = 1.0_DP
ftb0(4) = t
ft0 = 0.0_DP
ft1 = 0.0_DP
ft2 = 0.0_DP
ft2(1: 4) = fta2
ft1(1: 4) = fta1
ft1(5: 8) = ftb1
ft0(1: 4) = fta0
ft0(5: 8) = ftb0
ft0( 9) = ftc0(1)
ft0(10) = ftc0(2)
ft0(11) = ftc0(4)
end subroutine generalSolutionMinus1_Coeff_t
=====
subroutine generalSolutionMinus1_Coeff_s(t,fs0,fs1,fs2)
implicit none
real(DP)                                :: s, c
real(DP),                                intent(in)  :: t
real(DP), dimension(11), intent(out) :: fs0, fs1, fs2
real(DP), dimension(4)                  :: fsa0, fsa1, fsa2, fsb0, fsb1, fsc0
c = cos(2.0_DP * t)
s = sin(2.0_DP * t)
fsa2 = 0.0_DP
fsa1 = 0.0_DP
fsa0 = 0.0_DP
fsb1 = 0.0_DP
fsb0 = 0.0_DP
fsc0 = 0.0_DP
fsa2(1) = 4.0_DP * c
fsa2(2) = 4.0_DP * s
fsa1(1) = 8.0_DP * t * s - 12.0_DP * c
fsa1(2) = -8.0_DP * t * c - 12.0_DP * s
fsa1(3) = -4.0_DP
fsa1(4) = -4.0_DP * t
fsa0(1) = -4.0_DP * t**2 * c - 12.0_DP * t * s + 4.0_DP * c
fsa0(2) = -4.0_DP * t**2 * s + 12.0_DP * t * c + 4.0_DP * s
fsa0(3) = 4.0_DP
fsa0(4) = 4.0_DP * t
fsb0(1) = 4.0_DP * t * s - 6.0_DP * c
fsb0(2) = -4.0_DP * t * c - 6.0_DP * s
fsb0(3) = -2.0_DP
fsb0(4) = -2.0_DP * t
fsb1 = fsa2
fsc0 = fsa2
fs0 = 0.0_DP
fs1 = 0.0_DP
fs2 = 0.0_DP
fs2(1: 4) = fsa2
fs1(1: 4) = fsa1
fs1(5: 8) = fsb1
fs0(1: 4) = fsa0
fs0(5: 8) = fsb0
fs0( 9) = fsc0(1)
fs0(10) = fsc0(2)
fs0(11) = fsc0(4)
end subroutine generalSolutionMinus1_Coeff_s
=====

```

```

subroutine generalSolutionMinus1_Cartesian(d,p,f)
real(DP), dimension(11), intent(in) :: d
real(DP), dimension(2), intent(in) :: p
real(DP), dimension(0:3), intent(out) :: f
real(DP) :: r, t, pr, vr, vt, st, vx, vy
r = sqrt(dot_product(p,p))
t = angle(p)
call generalSolutionMinus1_Polar(d,r,t,pr,vr,vt,st)
call PolarToCartesian (t,vr,vt,vx,vy)
f = (/ pr, vx, vy, st /)
end subroutine generalSolutionMinus1_Cartesian
!=====
subroutine generalSolutionMinus1_Polar(d,r,t,pr,vr,vt,st)
implicit none
real(DP), parameter :: TOL = 1.0e-8_DP
real(DP), dimension(11), intent(in) :: d
real(DP), intent(in) :: r, t
real(DP), intent(out) :: pr, vr, vt, st
real(DP), dimension(11) :: fs0, fs1, fs2
real(DP), dimension(11) :: fp0, fp1, fp2
real(DP), dimension(11) :: fr0, fr1, fr2
real(DP), dimension(11) :: ft0, ft1, ft2
real(DP) :: lnr1, lnr2
if (r < TOL) then
st = 0.0_DP
pr = 0.0_DP
vr = 0.0_DP
vt = 0.0_DP
else
lnr2 = log(r)**2
lnr1 = log(r)
!
call generalSolutionMinus1_Coeff_s(t,fs0,fs1,fs2)
call generalSolutionMinus1_Coeff_p(t,fp0,fp1,fp2)
call generalSolutionMinus1_Coeff_r(t,fr0,fr1,fr2)
call generalSolutionMinus1_Coeff_t(t,ft0,ft1,ft2)
!
st = (dot_product(d,fs2) * lnr2 + dot_product(d,fs1) * lnr1 + dot_product(d,fs0)) / r**2
pr = (dot_product(d,fp2) * lnr2 + dot_product(d,fp1) * lnr1 + dot_product(d,fp0)) / r**2
vr = (dot_product(d,fr2) * lnr2 + dot_product(d,fr1) * lnr1 + dot_product(d,fr0)) / r
vt = (dot_product(d,ft2) * lnr2 + dot_product(d,ft1) * lnr1 + dot_product(d,ft0)) / r
end if
end subroutine generalSolutionMinus1_Polar
!=====
subroutine generalSolutionMinus1_Boundary(d)
implicit none
real(DP), dimension(11), intent(in) :: d
real(DP), dimension(11) :: fs0, fs1, fs2
real(DP), dimension(11) :: fp0, fp1, fp2
real(DP), dimension(11) :: fr0, fr1, fr2
real(DP), dimension(11) :: ft0, ft1, ft2
real(DP), dimension(11) :: gs0, gs1, gs2
real(DP), dimension(11) :: gp0, gp1, gp2
real(DP), dimension(11) :: gr0, gr1, gr2
real(DP), dimension(11) :: gt0, gt1, gt2
real(DP), dimension(11) :: hs0, hs1, hs2
real(DP), dimension(11) :: hp0, hp1, hp2
real(DP), dimension(11) :: hr0, hr1, hr2
real(DP), dimension(11) :: ht0, ht1, ht2
real(DP) :: t1, t2, t3

```

```

integer                                :: a1, a2, a3
t1 = 0.0_DP
t2 = sav_theta / 2.0_DP
t3 = sav_theta
a1 = nint(t1 * 180.0_DP / PI)
a2 = nint(t2 * 180.0_DP / PI)
a3 = nint(t3 * 180.0_DP / PI)
!
call generalSolutionMinus1_Coeff_s(t1,fs0,fs1,fs2)
call generalSolutionMinus1_Coeff_p(t1,fp0,fp1,fp2)
call generalSolutionMinus1_Coeff_r(t1,fr0,fr1,fr2)
call generalSolutionMinus1_Coeff_t(t1,ft0,ft1,ft2)
!
call generalSolutionMinus1_Coeff_s(t2,gs0,gs1,gs2)
call generalSolutionMinus1_Coeff_p(t2,gp0,gp1,gp2)
call generalSolutionMinus1_Coeff_r(t2,gr0,gr1,gr2)
call generalSolutionMinus1_Coeff_t(t2,gt0,gt1,gt2)
!
call generalSolutionMinus1_Coeff_s(t3,hs0,hs1,hs2)
call generalSolutionMinus1_Coeff_p(t3,hp0,hp1,hp2)
call generalSolutionMinus1_Coeff_r(t3,hr0,hr1,hr2)
call generalSolutionMinus1_Coeff_t(t3,ht0,ht1,ht2)
!
print 300
print 100, 'st', a1, dot_product(d,fs2), dot_product(d,fs1), dot_product(d,fs0), '-2'
print 100, 'pr', a1, dot_product(d,fp2), dot_product(d,fp1), dot_product(d,fp0), '-2'
print 100, 'vr', a1, dot_product(d,fr2), dot_product(d,fr1), dot_product(d,fr0), '-1'
print 100, 'vt', a1, dot_product(d,ft2), dot_product(d,ft1), dot_product(d,ft0), '-1'
print 200
print 100, 'st', a3, dot_product(d,hs2), dot_product(d,hs1), dot_product(d,hs0), '-2'
print 100, 'pr', a3, dot_product(d,hp2), dot_product(d,hp1), dot_product(d,hp0), '-2'
print 100, 'vr', a3, dot_product(d,hr2), dot_product(d,hr1), dot_product(d,hr0), '-1'
print 100, 'vt', a3, dot_product(d,ht2), dot_product(d,ht1), dot_product(d,ht0), '-1'
print 300
!
100 format (a, '(r,', i3, ')=[(', f16.12, ')lnr2+(', f16.12, ')ln+(', f16.12, ')]'r^', a)
200 format ()
300 format (79('-'))
!
end subroutine generalSolutionMinus1_Boundary
=====
subroutine generalSolutionMinus1_Check
implicit none
sav_d(1: 4) = (/ 1.37_DP, 5.76_DP, -6.32_DP, -7.98_DP /)
sav_d(5: 8) = (/ 4.84_DP, -4.21_DP, 8.91_DP, -9.62_DP /)
sav_d(9:11) = (/ -7.51_DP, 3.54_DP, 4.03_DP /)
call stokesEq2d_Cartesian(generalSolutionMinus1_FieldCartesian,'generalSolutionMinus1_Cartesian.txt')
call stokesEq2d_Polar(generalSolutionMinus1_FieldPolar,'generalSolutionMinus1_Polar.txt')
end subroutine generalSolutionMinus1_Check
=====
subroutine generalSolutionMinus1_FieldCartesian(p,f)
implicit none
real(DP), dimension(2), intent(in) :: p
real(DP), dimension(0:3), intent(out) :: f
call generalSolutionMinus1_Cartesian(sav_d,p,f)
end subroutine generalSolutionMinus1_FieldCartesian
=====
subroutine generalSolutionMinus1_FieldPolar(r,t,pr,vr,vt,st)
implicit none
real(DP), intent(in) :: r, t

```

```

    real(DP), intent(out) :: pr, vr, vt, st
    call generalSolutionMinus1_Polar(sav_d,r,t,pr,vr,vt,st)
    end subroutine generalSolutionMinus1_FieldPolar
!=====
end module mod_generalSolutionMinus1
!#####
! Copyright 2013 by Ludwig C. Nitsche
!-----
module mod_generalSolution
use mod_constants
use mod_utilities
use mod_stokesEq2d
implicit none
private
public :: generalSolution_SetAngle
public :: generalSolution_Coeff_p
public :: generalSolution_Coeff_r
public :: generalSolution_Coeff_t
public :: generalSolution_Coeff_s
public :: generalSolution_Cartesian
public :: generalSolution_Polar
public :: generalSolution_Check
public :: generalSolution_Boundary
real(DP)          :: sav_theta = PI / 2.0_DP
real(DP)          :: sav_w
real(DP), dimension(12) :: sav_d
contains
!=====
    function kap(i,t,w) result(f)
    integer, intent(in) :: i
    real(DP), intent(in) :: t, w
    real(DP), dimension(4) :: f
    real(DP) :: mu, nu
    mu = w + 1.0_DP
    nu = w - 1.0_DP
    f(1) = mu**i * cos(mu * t)
    f(2) = mu**i * sin(mu * t)
    f(3) = nu**i * cos(nu * t)
    f(4) = nu**i * sin(nu * t)
    end function kap
!=====
    function lam(i,t,w) result(f)
    integer, intent(in) :: i
    real(DP), intent(in) :: t, w
    real(DP), dimension(4) :: f
    real(DP) :: mu, nu
    mu = w + 1.0_DP
    nu = w - 1.0_DP
    f(1) = -mu**i * sin(mu * t)
    f(2) = mu**i * cos(mu * t)
    f(3) = -nu**i * sin(nu * t)
    f(4) = nu**i * cos(nu * t)
    end function lam
!=====
    function alp(i,t,w) result(f)
    integer, intent(in) :: i
    real(DP), intent(in) :: t, w
    real(DP), dimension(4) :: f
    select case(i)
        case(1)

```

```

      f = (w + 1.0_DP)**2 * lam(1,t,w) - lam(3,t,w)
case(2)
      f = 2 * (w + 1.0_DP)**2 * (lam(0,t,w) - t * kap(1,t,w)) &
        - 6.0_DP * lam(2,t,w) + 2.0_DP * t * kap(3,t,w)
case(3)
      f = 6.0_DP * (t * kap(2,t,w) - lam(1,t,w)) + t**2 * lam(3,t,w) &
        - (w + 1.0_DP)**2 * t * (2.0_DP * kap(0,t,w) + t * lam(1,t,w))
case(4)
      f = t * kap(3,t,w) - 3.0_DP * lam(2,t,w) &
        + (w + 1.0_DP)**2 * (lam(0,t,w) - t * kap(1,t,w))
case default
      f = 0.0d0
end select
end function alp
=====
subroutine generalSolution_SetAngle(angle)
implicit none
integer, intent(in) :: angle
sav_theta = real(angle,DP) * PI / 180.0_DP
end subroutine generalSolution_SetAngle
=====
subroutine generalSolution_Coeff_p(t,w,fp0,fp1,fp2)
implicit none
real(DP),          intent(in)  :: t, w
real(DP), dimension(12), intent(out) :: fp0, fp1, fp2
real(DP), dimension(4)  :: fpa0, fpa1, fpa2, fpb0, fpb1, fpc0
fpa2 = -alp(1,t,w) / (w - 1.0_DP)
fpb1 = fpa2
fpc0 = fpa2
fpa1 = -alp(2,t,w) / (w - 1.0_DP) + 2.0_DP / (w - 1.0_DP)**2 * alp(1,t,w) &
      - 4.0_DP * (w + 1.0_DP) / (w - 1.0_DP) * lam(1,t,w)
fpa0 = -alp(3,t,w) / (w - 1.0_DP) + alp(2,t,w) / (w - 1.0_DP)**2 &
      - 2.0_DP / (w - 1.0_DP)**3 * alp(1,t,w) &
      - 4.0_DP * (w + 1.0_DP) / (w - 1.0_DP) * (lam(0,t,w) - t * kap(1,t,w)) &
      + 2.0_DP * (3.0_DP + w) / (w - 1.0_DP)**2 * lam(1,t,w)
fpb0 = -alp(4,t,w) / (w - 1.0_DP) + alp(1,t,w) / (w - 1.0_DP)**2 &
      - 2.0_DP * (w + 1.0_DP) / (w - 1.0_DP) * lam(1,t,w)
fp0 = 0.0_DP
fp1 = 0.0_DP
fp2 = 0.0_DP
fp2(1:4) = fpa2
fp1(1:4) = fpa1
fp1(5:8) = fpb1
fp0(1:4) = fpa0
fp0(5:8) = fpb0
fp0(9:12) = fpc0
end subroutine generalSolution_Coeff_p
=====
subroutine generalSolution_Coeff_r(t,w,fr0,fr1,fr2)
implicit none
real(DP),          intent(in)  :: t, w
real(DP), dimension(12), intent(out) :: fr0, fr1, fr2
real(DP), dimension(4)  :: fra0, fra1, fra2, frb0, frb1, frc0
fra2 = -lam(1,t,w)
frb1 = fra2
frc0 = fra2
fra1 = 2.0_DP * t * kap(1,t,w) - 2.0_DP * lam(0,t,w)
fra0 = 2.0_DP * t * kap(0,t,w) + t**2 * lam(1,t,w)
frb0 = t * kap(1,t,w) - lam(0,t,w)
fr0 = 0.0_DP

```

```

fr1 = 0.0_DP
fr2 = 0.0_DP
fr2(1: 4) = fra2
fr1(1: 4) = fra1
fr1(5: 8) = frb1
fr0(1: 4) = fra0
fr0(5: 8) = frb0
fr0(9:12) = frc0
end subroutine generalSolution_Coeff_r
!=====
subroutine generalSolution_Coeff_t(t,w,ft0,ft1,ft2)
implicit none
real(DP),          intent(in)  :: t, w
real(DP), dimension(12), intent(out) :: ft0, ft1, ft2
real(DP), dimension(4)          :: fta0, fta1, fta2, ftb0, ftb1, ftc0
fta2 = (w + 1.0_DP) * kap(0,t,w)
ftb1 = fta2
ftc0 = fta2
fta1 = 2.0_DP * (kap(0,t,w) + (w + 1.0_DP) * t * lam(0,t,w))
fta0 = 2.0_DP * t * lam(0,t,w) - (w + 1.0_DP) * t**2 * kap(0,t,w)
ftb0 = kap(0,t,w) + (w + 1.0_DP) * t * lam(0,t,w)
ft0 = 0.0_DP
ft1 = 0.0_DP
ft2 = 0.0_DP
ft2(1: 4) = fta2
ft1(1: 4) = fta1
ft1(5: 8) = ftb1
ft0(1: 4) = fta0
ft0(5: 8) = ftb0
ft0(9:12) = ftc0
end subroutine generalSolution_Coeff_t
!=====
subroutine generalSolution_Coeff_s(t,w,fs0,fs1,fs2)
implicit none
real(DP),          intent(in)  :: t, w
real(DP), dimension(12), intent(out) :: fs0, fs1, fs2
real(DP), dimension(4)          :: fsa0, fsa1, fsa2, fsb0, fsb1, fsc0
fsa2 = kap(2,t,w) - (1.0_DP - w**2) * kap(0,t,w)
fsb1 = fsa2
fsc0 = fsa2
fsa1 = 4.0_DP * (w * kap(0,t,w) + kap(1,t,w)) + 2.0_DP * t * lam(2,t,w) &
      - 2.0_DP * (1.0_DP - w**2) * t * lam(0,t,w)
fsa0 = (4.0_DP + (1.0_DP - w**2) * t**2) * kap(0,t,w) &
      + 4.0_DP * t * (w * lam(0,t,w) + lam(1,t,w)) - t**2 * kap(2,t,w)
fsb0 = 2.0_DP * (kap(1,t,w) + w * kap(0,t,w)) + t * lam(2,t,w) &
      - (1.0_DP - w**2) * t * lam(0,t,w)
fs0 = 0.0_DP
fs1 = 0.0_DP
fs2 = 0.0_DP
fs2(1: 4) = fsa2
fs1(1: 4) = fsa1
fs1(5: 8) = fsb1
fs0(1: 4) = fsa0
fs0(5: 8) = fsb0
fs0(9:12) = fsc0
end subroutine generalSolution_Coeff_s
!=====
subroutine generalSolution_Cartesian(w,d,p,f)
real(DP),          intent(in)  :: w
real(DP), dimension(12), intent(in) :: d

```



```

real(DP), dimension(2), intent(in) :: p
real(DP), dimension(0:3), intent(out) :: f
real(DP) :: r, t, pr, vr, vt, st, vx, vy
r = sqrt(dot_product(p,p))
t = angle(p)
call generalSolution_Polar(w,d,r,t,pr,vr,vt,st)
call PolarToCartesian (t,vr,vt,vx,vy)
f = (/ pr, vx, vy, st /)
end subroutine generalSolution_Cartesian
!=====
subroutine generalSolution_Polar(w,d,r,t,pr,vr,vt,st)
implicit none
real(DP), parameter :: TOL = 1.0e-8_DP
real(DP), dimension(12), intent(in) :: d
real(DP), intent(in) :: r, t, w
real(DP), intent(out) :: pr, vr, vt, st
real(DP), dimension(12) :: fs0, fs1, fs2
real(DP), dimension(12) :: fp0, fp1, fp2
real(DP), dimension(12) :: fr0, fr1, fr2
real(DP), dimension(12) :: ft0, ft1, ft2
real(DP) :: lnr1, lnr2
if (r < TOL) then
  st = 0.0_DP
  pr = 0.0_DP
  vr = 0.0_DP
  vt = 0.0_DP
else
  lnr2 = log(r)**2
  lnr1 = log(r)
!
  call generalSolution_Coeff_s(t,w,fs0,fs1,fs2)
  call generalSolution_Coeff_p(t,w,fp0,fp1,fp2)
  call generalSolution_Coeff_r(t,w,fr0,fr1,fr2)
  call generalSolution_Coeff_t(t,w,ft0,ft1,ft2)
!
  st = (dot_product(d,fs2) * lnr2 + dot_product(d,fs1) * lnr1 + dot_product(d,fs0)) * r**(w - 1.0_DP)
  pr = (dot_product(d,fp2) * lnr2 + dot_product(d,fp1) * lnr1 + dot_product(d,fp0)) * r**(w - 1.0_DP)
  vr = (dot_product(d,fr2) * lnr2 + dot_product(d,fr1) * lnr1 + dot_product(d,fr0)) * r**w
  vt = (dot_product(d,ft2) * lnr2 + dot_product(d,ft1) * lnr1 + dot_product(d,ft0)) * r**w
end if
end subroutine generalSolution_Polar
!=====
subroutine generalSolution_Boundary(w,d)
implicit none
real(DP), intent(in) :: w
real(DP), dimension(12), intent(in) :: d
real(DP), dimension(12) :: fs0, fs1, fs2
real(DP), dimension(12) :: fp0, fp1, fp2
real(DP), dimension(12) :: fr0, fr1, fr2
real(DP), dimension(12) :: ft0, ft1, ft2
real(DP), dimension(12) :: gs0, gs1, gs2
real(DP), dimension(12) :: gp0, gp1, gp2
real(DP), dimension(12) :: gr0, gr1, gr2
real(DP), dimension(12) :: gt0, gt1, gt2
real(DP), dimension(12) :: hs0, hs1, hs2
real(DP), dimension(12) :: hp0, hp1, hp2
real(DP), dimension(12) :: hr0, hr1, hr2
real(DP), dimension(12) :: ht0, ht1, ht2
real(DP) :: t1, t2, t3
integer :: a1, a2, a3

```

```

t1 = 0.0_DP
t2 = sav_theta / 2.0_DP
t3 = sav_theta
a1 = nint(t1 * 180.0_DP / PI)
a2 = nint(t2 * 180.0_DP / PI)
a3 = nint(t3 * 180.0_DP / PI)
!
call generalSolution_Coeff_s(t1,w,fs0,fs1,fs2)
call generalSolution_Coeff_p(t1,w,fp0,fp1,fp2)
call generalSolution_Coeff_r(t1,w,fr0,fr1,fr2)
call generalSolution_Coeff_t(t1,w,ft0,ft1,ft2)
!
call generalSolution_Coeff_s(t2,w,gs0,gs1,gs2)
call generalSolution_Coeff_p(t2,w,gp0,gp1,gp2)
call generalSolution_Coeff_r(t2,w,gr0,gr1,gr2)
call generalSolution_Coeff_t(t2,w,gt0,gt1,gt2)
!
call generalSolution_Coeff_s(t3,w,hs0,hs1,hs2)
call generalSolution_Coeff_p(t3,w,hp0,hp1,hp2)
call generalSolution_Coeff_r(t3,w,hr0,hr1,hr2)
call generalSolution_Coeff_t(t3,w,ht0,ht1,ht2)
!
print 300
print 100, 'st', a1, dot_product(d,fs2), dot_product(d,fs1), dot_product(d,fs0), w - 1.0_DP
print 100, 'pr', a1, dot_product(d,fp2), dot_product(d,fp1), dot_product(d,fp0), w - 1.0_DP
print 100, 'vr', a1, dot_product(d,fr2), dot_product(d,fr1), dot_product(d,fr0), w
print 100, 'vt', a1, dot_product(d,ft2), dot_product(d,ft1), dot_product(d,ft0), w
print 200
print 100, 'st', a3, dot_product(d,hs2), dot_product(d,hs1), dot_product(d,hs0), w - 1.0_DP
print 100, 'pr', a3, dot_product(d,hp2), dot_product(d,hp1), dot_product(d,hp0), w - 1.0_DP
print 100, 'vr', a3, dot_product(d,hr2), dot_product(d,hr1), dot_product(d,hr0), w
print 100, 'vt', a3, dot_product(d,ht2), dot_product(d,ht1), dot_product(d,ht0), w
print 300
!
100 format (a, '(r, ', i3, ') = [(', f10.6, ') ln(r)^2 + (', f10.6, ') ln(r) + (', f10.6, ')] r^(', f4.1, ')')
200 format ( )
300 format (79('-'))
!
end subroutine generalSolution_Boundary
!=====
subroutine generalSolution_Check
implicit none
sav_w = 2.37_DP
sav_d(1: 4) = (/ 1.37_DP, 5.76_DP, -6.32_DP, -7.98_DP /)
sav_d(5: 8) = (/ 4.84_DP, -4.21_DP, 8.91_DP, -9.62_DP /)
sav_d(9:12) = (/ -7.51_DP, 3.54_DP, 4.03_DP, 3.72_DP /)
call stokesEq2d_Cartesian(generalSolution_FieldCartesian,'generalSolution_Cartesian.txt')
call stokesEq2d_Polar(generalSolution_FieldPolar,'generalSolution_Polar.txt')
end subroutine generalSolution_Check
!=====
subroutine generalSolution_FieldCartesian(p,f)
implicit none
real(DP), dimension(2), intent(in) :: p
real(DP), dimension(0:3), intent(out) :: f
call generalSolution_Cartesian(sav_w,sav_d,p,f)
end subroutine generalSolution_FieldCartesian
!=====
subroutine generalSolution_FieldPolar(r,t,pr,vr,vt,st)
implicit none
real(DP), intent(in) :: r, t

```

```

    real(DP), intent(out) :: pr, vr, vt, st
    call generalSolution_Polar(sav_w,sav_d,r,t,pr,vr,vt,st)
    end subroutine generalSolution_FieldPolar
!=====
end module mod_generalSolution
!#####
! Copyright 2013 by Ludwig C. Nitsche
!-----
module mod_genSol
use mod_constants
use mod_utilities
use mod_generalSolutionPlus1
use mod_generalSolutionMinus1
use mod_generalSolution
implicit none
private
public :: genSol_Cartesian
public :: genSol_Polar
public :: genSol_SetAngle
contains
!=====
    subroutine genSol_Cartesian(w,d,p,f)
    implicit none
    real(DP),          parameter    :: TOL = 1.0e-6_DP
    real(DP),          intent(in)   :: w
    real(DP), dimension(12), intent(in) :: d
    real(DP), dimension(2),  intent(in) :: p
    real(DP), dimension(0:3), intent(out) :: f
    real(DP), dimension(10)      :: dPlus1
    real(DP), dimension(11)      :: dMinus1
    if (abs(w - 1.0_DP) < TOL) then
        dPlus1(1: 6) = d(1: 6)
        dPlus1(7:10) = d(9:12)
        call generalSolutionPlus1_Cartesian(dPlus1,p,f)
    else if(abs(w + 1.0_DP) < TOL) then
        dMinus1(1:10) = d(1:10)
        dMinus1( 11) = d( 12)
        call generalSolutionMinus1_Cartesian(dMinus1,p,f)
    else
        call generalSolution_Cartesian(w,d,p,f)
    end if
    end subroutine genSol_Cartesian
!=====
    subroutine gensol_Polar(w,d,r,t,pr,vr,vt,st)
    implicit none
    real(DP),          parameter    :: TOL = 1.0e-6_DP
    real(DP),          intent(in)   :: r, t, w
    real(DP), dimension(12), intent(in) :: d
    real(DP),          intent(out)  :: pr, vr, vt, st
    real(DP), dimension(10)      :: dPlus1
    real(DP), dimension(11)      :: dMinus1
    if (abs(w - 1.0_DP) < TOL) then
        dPlus1(1: 6) = d(1: 6)
        dPlus1(7:10) = d(9:12)
        call generalSolutionPlus1_Polar(dPlus1,r,t,pr,vr,vt,st)
    else if(abs(w + 1.0_DP) < TOL) then
        dMinus1 = d(1:11)
        call generalSolutionMinus1_Polar(dMinus1,r,t,pr,vr,vt,st)
    else
        call generalSolution_Polar(w,d,r,t,pr,vr,vt,st)
    end if
    end subroutine gensol_Polar
!=====

```

```

end if
end subroutine gensol_Polar
!=====
subroutine genSol_SetAngle(angle)
implicit none
integer, intent(in) :: angle
call generalSolutionPlus1_SetAngle(angle)
call generalSolutionMinus1_SetAngle(angle)
call generalSolution_SetAngle(angle)
call generalSolutionPlus1_Check
call generalSolutionMinus1_Check
call generalSolution_Check
end subroutine genSol_SetAngle
!=====
end module mod_genSol
!#####
! Copyright 2013 by Ludwig C. Nitsche
!-----
module mod_outer0
use mod_constants
use mod_utilities
use mod_stokesEq2d
implicit none
private
type, public :: typ_outer0
  private
  real(DP) :: theta = PI / 2.0_DP
contains
  procedure :: SetAngle => outer0_SetAngle
  procedure :: Cartesian => outer0_Cartesian
  procedure :: Polar => outer0_Polar
  procedure :: Boundary => outer0_Boundary
  procedure :: Check => outer0_Check
end type typ_outer0
contains
!=====
subroutine outer0_SetAngle(this,arg_angle)
implicit none
class(typ_outer0), intent(inout) :: this
integer, intent(in) :: arg_angle
this%theta = real(arg_angle,DP) * PI / 180.0_DP
end subroutine outer0_SetAngle
!=====
subroutine outer0_Cartesian(this,arg_p,arg_f)
implicit none
real(DP), parameter :: TOL = 1.0d-9
class(typ_outer0), intent(in) :: this
real(DP), dimension(2), intent(in) :: arg_p
real(DP), dimension(0:3), intent(out) :: arg_f
real(DP) :: r, t, x, y
real(DP) :: a, b, c, d, e
real(DP) :: pr, vx, vy, st
real(DP) :: th, sn, cs
r = sqrt(dot_product(arg_p,arg_p))
if (r < TOL) then
  arg_f = 0.0d0
else
  th = this%theta
  sn = sin(th)
  cs = cos(th)

```

```

a = -1.0_DP
b = -(th + cs * sn) / (th**2 - sn**2)
c = (th + cs * sn) / (th**2 - sn**2)
d = sn**2 / (th**2 - sn**2)
e = th**2 + cs**2 - 1.0_DP
x = arg_p(1)
y = arg_p(2)
t = angle(arg_p)
vx = -b - d * t - (d * x * y + c * x**2) / r**2
vy = a + c * t - (c * x * y + d * y**2) / r**2
pr = 1.0_DP - 2.0_DP * (c * x + d * y) / r**2
st = 2.0_DP * (x * (cs**2 - 1.0_DP) + y * (th + cs * sn)) / (e * r**2)
arg_f = (/ pr, vx, vy, st /)
end if
end subroutine outer0_Cartesian
!=====
subroutine outer0_Polar(this,arg_r,arg_t,arg_pr,arg_vr,arg_vt,arg_st)
implicit none
class(typ_outer0), intent(in) :: this
real(DP), intent(in) :: arg_r, arg_t
real(DP), intent(out) :: arg_st, arg_pr, arg_vr, arg_vt
real(DP) :: r, s, c, t, sn, cs, th
real(DP) :: alpha, beta, gamma
th = this%theta
sn = sin(th)
cs = cos(th)
t = arg_t
s = sin(t)
c = cos(t)
r = arg_r
alpha = cs**2 - 1.0_DP
beta = th + cs * sn
gamma = th**2 + cs**2 - 1.0_DP
arg_pr = 2.0_DP * (alpha * s - beta * c) / (gamma * r) + 1.0_DP
arg_st = 2.0_DP * (alpha * c + beta * s) / (gamma * r)
arg_vr = (beta * (t * s) + alpha * (t * c) - s * th**2) / gamma
arg_vt = (beta * (t * c - s) - alpha * (t * s + c) - c * th**2) / gamma
end subroutine outer0_Polar
!=====
subroutine outer0_Boundary(this,arg_pr,arg_vr,arg_vt,arg_st)
class(typ_outer0), intent(in) :: this
real(DP), intent(out) :: arg_pr, arg_vr, arg_vt, arg_st
real(DP) :: alpha, beta, gamma, th, cs, sn
arg_pr = 0.0_DP
arg_vr = 0.0_DP
arg_vt = 0.0_DP
arg_st = 0.0_DP
th = this%theta
sn = sin(th)
cs = cos(th)
alpha = cs**2 - 1.0_DP
beta = th + cs * sn
gamma = th**2 + cs**2 - 1.0_DP
arg_st = 2.0_DP * alpha / gamma
arg_pr = -2.0_DP * beta / gamma
arg_vr = 0.0_DP
arg_vt = -1.0_DP
!
100 format (79('-'))
200 format (a, '(r,', i1, ') = (', f17.10, ') r^(', f5.1, ')')

```

```

250 format (a, '(r,', i1, ') = (', f17.10, ') r^(', f5.1, ') + 1')
end subroutine outer0_Boundary
!=====
subroutine outer0_Check(this)
implicit none
class(typ_outer0), intent(in) :: this
call outer0_CHECK_CARTESIAN(this)
call outer0_CHECK_POLAR(this)
end subroutine outer0_Check
!=====
subroutine outer0_CHECK_CARTESIAN(this)
implicit none
class(typ_outer0), intent(in) :: this
real(DP) :: x, y, vx, vy
real(DP) :: r, t, pr, vr, vt, st
real(DP), dimension(2) :: p
real(DP), dimension(0:3) :: f
10 print*, 'x, y ?'
read *, x, y
if (x < 0.0_DP) then
return
end if
p = (/ x, y /)
call outer0_Cartesian(this,p,f)
print 100, 'c ', f
print*
r = sqrt(x**2 + y**2)
t = angle(p)
pr = f(0)
vx = f(1)
vy = f(2)
call CartesianToPolar(t,vx,vy,vr,vt)
print 100, 'p ', pr, vr, vt
call outer0_Polar(this,r,t,pr,vr,vt,st)
print 100, 'p ', pr, vr, vt
goto 10
100 format(a, 3(1x, f12.7))
end subroutine outer0_CHECK_CARTESIAN
!=====
subroutine outer0_CHECK_POLAR(this)
implicit none
class(typ_outer0), intent(in) :: this
integer :: angle
real(DP) :: r, t
real(DP) :: pr, vr, vt, st
real(DP) :: x, y, vx, vy
real(DP), dimension(2) :: p
real(DP), dimension(0:3) :: f
10 print*, 'r, angle ?'
read *, r, angle
if (r < 0.0_DP) then
return
end if
t = real(angle,DP) * PI / 180.0_DP
call outer0_Polar(this,r,t,pr,vr,vt,st)
print 100, 'p ', pr, vr, vt
print*
call PolarToCartesian(t,vr,vt,vx,vy)
print 100, 'c ', pr, vx, vy
p(1) = r * cos(t)

```

```

        p(2) = r * sin(t)
        call outer0_Cartesian(this,p,f)
        print 100, 'c ', f(0:2)
        goto 10
100 format(a, 3(1x, f12.7))
    end subroutine outer0_CHECK_POLAR
!=====
end module mod_outer0
!#####
! Copyright 2013 by Ludwig C. Nitsche
!-----
module mod_outer1
use mod_constants
use mod_utilities
use mod_generalSolutionMinus1
implicit none
private
type, public :: typ_outer1
    private
    integer :: k = 1
    integer :: angle = 90
contains
    procedure :: SetAngle    => outer1_SetAngle
    procedure :: SetSolution => outer1_SetSolution
    procedure :: Boundary    => outer1_Boundary
    procedure :: Cartesian    => outer1_Cartesian
    procedure :: Polar        => outer1_Polar
end type typ_outer1
contains
!=====
    subroutine outer1_SetAngle(this,arg_angle)
    implicit none
    class(typ_outer1), intent(inout) :: this
    integer,          intent(in)    :: arg_angle
    this%angle = clip(arg_angle,45,180)
    end subroutine outer1_SetAngle
!=====
    subroutine outer1_SetSolution(this,arg_k)
    implicit none
    class(typ_outer1), intent(inout) :: this
    integer,          intent(in)    :: arg_k
    this%k = clip(arg_k,1,3)
    end subroutine outer1_SetSolution
!=====
    subroutine outer1_Boundary(this,arg_pr,arg_vr,arg_vt,arg_st)
    class(typ_outer1),          intent(in) :: this
    real(DP), dimension(0:1), intent(out) :: arg_pr, arg_vr, arg_vt, arg_st
    arg_pr = 0.0_DP
    arg_vr = 0.0_DP
    arg_vt = 0.0_DP
    arg_st = 0.0_DP
    if (this%k == 1) then
        if (this%angle == 135) then
            arg_st(1) = 8.0_DP / (4.0_DP + 3.0_DP * PI)
            arg_pr(1) = -8.0_DP / (4.0_DP + 3.0_DP * PI)
            arg_pr(0) = -8.0_DP / (4.0_DP + 3.0_DP * PI)
            arg_vt(0) = 1.0_DP
        else if (this%angle == 90) then
            arg_st(1) = 2.0_DP
            arg_pr(0) = PI / 2.0_DP
        end if
    end if
end subroutine outer1_Boundary
!=====

```

```

    arg_vt(0) = 1.0_DP
  else if (this%angle == 45) then
    arg_st(1) = 9.319584732650_DP
    arg_st(0) = -15.167889203639_DP
    arg_pr(1) = 9.319584732649_DP
    arg_pr(0) = -5.848304470989_DP
    arg_vt(0) = 1.0_DP
    arg_st(1) = 8.0_DP / (4.0_DP - PI)
    arg_st(0) = -(88.0_DP + PI) / (4.0_DP - PI) / 7.0_DP
    arg_pr(1) = 8.0_DP / (4.0_DP - PI)
    arg_pr(0) = -(32.0_DP + PI) / (4.0_DP - PI) / 7.0_DP
    arg_vt(0) = 1.0_DP
  end if
else if (this%k == 2) then
  if (this%angle == 135) then
    arg_st(0) = 1.0_DP
    arg_pr(0) = 1.0_DP
    arg_vr(0) = 1.0_DP
  else if (this%angle == 90) then
    arg_pr(0) = 1.0_DP
    arg_vr(0) = 1.0_DP
  else if (this%angle == 45) then
    arg_pr(0) = 2.0_DP
    arg_vr(0) = 1.0_DP
  end if
else
  if (this%angle == 135) then
    arg_st(0) = 1.0_DP
    arg_pr(0) = -1.0_DP
  else if (this%angle == 90) then
    arg_st(0) = 1.0_DP
  else if (this%angle == 45) then
    arg_st(0) = 1.0_DP
    arg_pr(0) = 1.0_DP
  end if
end if
!
100 format(79('-',))
200 format(a, '(r, ', i1, ') = [ (' , f17.10, ') ln(r) + (' f17.10, ') ] r^(', f5.1, ')')
300 format(i3, 1x, f12.7, 3x, 4(4x, f12.7, 1x, f12.7))
end subroutine outer1_Boundary
!=====
subroutine outer1_Cartesian(this,arg_p,arg_f)
implicit none
class(typ_outer1),          intent(in)  :: this
real(DP), dimension(2),    intent(in)  :: arg_p
real(DP), dimension(0:3),  intent(out)  :: arg_f
real(DP), dimension(11)    :: d
call outer1_COEFFICIENTS(this,d)
call generalSolutionMinus1_Cartesian(d,arg_p,arg_f)
end subroutine outer1_Cartesian
!=====
subroutine outer1_Polar(this,arg_r,arg_t,arg_pr,arg_vr,arg_vt,arg_st)
implicit none
class(typ_outer1), intent(in)  :: this
real(DP),          intent(in)  :: arg_r, arg_t
real(DP),          intent(out)  :: arg_st, arg_pr, arg_vr, arg_vt
real(DP), dimension(11) :: d
call outer1_COEFFICIENTS(this,d)
call generalSolutionMinus1_Polar(d,arg_r,arg_t,arg_pr,arg_vr,arg_vt,arg_st)

```



```

end subroutine outer1_Polar
!=====
subroutine outer1_COEFFICIENTS(this,arg_d)
class(typ_outer1), intent(in) :: this
real(DP), dimension(11), intent(out) :: arg_d
arg_d = 0.0_DP
if (this%k == 1) then
  if (this%angle == 135) then
    arg_d( 5) = 2.0_DP / (4.0_DP + 3.0_DP * PI)
    arg_d( 6) = 2.0_DP / (4.0_DP + 3.0_DP * PI)
    arg_d( 7) = (2.0_DP + 3.0_DP * PI) / (4.0_DP + 3.0_DP * PI)
    arg_d( 8) = -4.0_DP / (4.0_DP + 3.0_DP * PI)
    arg_d( 9) = (8.0_DP + 3.0_DP * PI) / (4.0_DP + 3.0_DP * PI) / 2.0_DP
    arg_d(10) = 4.0_DP / (4.0_DP + 3.0_DP * PI)
    arg_d(11) = -6.0_DP / (4.0_DP + 3.0_DP * PI)
  else if (this%angle == 90) then
    arg_d( 5) = 1.0_DP / 2.0_DP
    arg_d( 7) = 1.0_DP / 2.0_DP
    arg_d( 9) = 1.0_DP
    arg_d(10) = -PI / 8.0_DP
    arg_d(11) = PI / 4.0_DP
  else if (this%angle == 45) then
    arg_d( 5) = 2.3298961831624853680_DP
    arg_d( 6) = -2.3298961831623499208_DP
    arg_d( 7) = -1.3298961831625004670_DP
    arg_d( 8) = 4.6597923663248641546_DP
    arg_d( 9) = -0.96207611774735968257_DP
    arg_d(10) = -0.86782006541512501929_DP
    arg_d(11) = -0.59425605233209999323_DP
    arg_d( 5) = 2.0_DP / (4.0_DP - PI)
    arg_d( 6) = -2.0_DP / (4.0_DP - PI)
    arg_d( 7) = (2.0_DP - PI) / (4.0_DP - PI)
    arg_d( 8) = 4.0_DP / (4.0_DP - PI)
    arg_d( 9) = 3.0_DP * (8.0_DP - 5.0_DP * PI) / (4.0_DP - PI) / 28.0_DP
    arg_d(10) = (PI - 24.0_DP) / (4.0_DP - PI) / 28.0_DP
    arg_d(11) = -(4.0_DP + PI) / (4.0_DP - PI) / 14.0_DP
  end if
else if (this%k == 2) then
  if (this%angle == 135) then
    arg_d( 9) = 1.0_DP / 4.0_DP
    arg_d(10) = -1.0_DP / 4.0_DP
    arg_d(11) = -1.0_DP / 2.0_DP
  else if (this%angle == 90) then
    arg_d(10) = -1.0_DP / 4.0_DP
    arg_d(11) = -1.0_DP / 2.0_DP
  else if (this%angle == 45) then
    arg_d(10) = -1.0_DP / 2.0_DP
  end if
else
  if (this%angle == 135) then
    arg_d( 9) = 1.0_DP / 4.0_DP
    arg_d(10) = 1.0_DP / 4.0_DP
    arg_d(11) = -1.0_DP / 2.0_DP
  else if (this%angle == 90) then
    arg_d( 9) = 1.0_DP / 4.0_DP
  else if (this%angle == 45) then
    arg_d( 9) = 1.0_DP / 4.0_DP
    arg_d(10) = -1.0_DP / 4.0_DP
    arg_d(11) = 1.0_DP / 2.0_DP
  end if
end if

```

```

    end if
  end subroutine outer1_COEFFICIENTS
!=====
end module mod_outer1
!#####
! Copyright 2013 by Ludwig C. Nitsche
!-----
module mod_outer1Check
use mod_constants
use mod_stokesEq2d
use mod_outer1
implicit none
private
public :: outer1Check
type(typ_outer1)      :: sav_outer1
real(DP), dimension(3) :: sav_c = (/ 3.0_DP, 2.0_DP, 4.0_DP /)
contains
!=====
  subroutine outer1Check
    implicit none
    integer angle
    print*, 'outer1Check'
    print*, 'angle ?'
    read *, angle
    call sav_outer1%SetAngle(angle)
    call stokesEq2d_Cartesian(outer1Check_CARTESIAN,'outer1_Cartesian.txt')
    call stokesEq2d_Polar(outer1Check_POLAR,'outer1_Polar.txt')
    call outer1Check_BOUNDARY(angle)
  end subroutine outer1Check
!=====
  subroutine outer1Check_BOUNDARY(arg_angle)
    integer, intent(in)      :: arg_angle
    integer                  :: i, iMax, k
    real(DP)                 :: r, rMax, rMin, w, t
    real(DP)                 :: st1, pr1, vr1, vt1
    real(DP)                 :: st2, pr2, vr2, vt2
    real(DP)                 :: st3, pr3, vr3, vt3
    real(DP)                 :: error, maxErrorMax
    real(DP), dimension(2)   :: errorMax
    real(DP), dimension(0:1) :: pr, vr, vt, st
    open(unit = 20, file = 'outer1_Boundary.txt')
    rMin = 0.5_DP
    rMax = 1.5_DP
    iMax = 10
    do k = 1, 3
      call sav_outer1%SetSolution(k)
      call sav_outer1%Boundary(pr,vr,vt,st)
      write(20,100) k
      write(20,200) 'st', st(1), st(0)
      write(20,200) 'pr', pr(1), pr(0)
      write(20,250) 'vr', vr(1), vr(0)
      write(20,250) 'vt', vt(1), vt(0)
      write(20,300), arg_angle, arg_angle
      errorMax(k) = 0.0_DP
      do i = 0, iMax
        r = rMin + (rMax - rMin) * real(i,DP) / real(iMax,DP)
        st1 = (st(1) * log(r) + st(0)) / r**2
        pr1 = (pr(1) * log(r) + pr(0)) / r**2
        vr1 = (vr(1) * log(r) + vr(0)) / r
        vt1 = (vt(1) * log(r) + vt(0)) / r

```

```

        t = 0.0_DP
        call sav_outer1%Polar(r,t,pr2,vr2,vt2,st2)
        t = real(arg_angle,DP) * PI / 180.0_DP
        call sav_outer1%Polar(r,t,pr3,vr3,vt3,st3)
        write(20,400) r, vr3, vt3, st1, st2, pr1, pr2, vr1, vr2, vt1, vt2
        error = max(abs(vr3),abs(vt3),abs(st1-st2),abs(pr1-pr2),abs(vr1-vr2),abs(vt1-vt2))
        if (error > errorMax(k)) then
            errorMax(k) = error
        end if
    end do
    write(20,500) errorMax(k)
end do
write(20,600)
maxErrorMax = maxval(errorMax)
write(20,700) maxErrorMax
close(20)
100 format (157('-')) / 'First Order Outer Solution: ', i1 /)
200 format (a, '(r,0) = [ (', f10.6, ') ln(r) + (', f10.6, ') ] / r^2')
250 format (a, '(r,0) = [ (', f10.6, ') ln(r) + (', f10.6, ') ] / r')
300 format (/ '
            r', 4x, ' vr(r,' i3, ')', 1x, ' vt(r,' i3, ')', 4x, &
            ' stress(r,0)', 1x, ' stess(r,0)', 4x, ' pr(r,0)', 1x, &
            ' pr(r,0)', 4x, ' vr(r,0)', 1x, ' vr(r,0)', 4x, &
            ' vt(r,0)', 1x, ' vt(r,0)' /
            12('-'), 5(4x, 12('-'), 1x, 12('-'))))
400 format(f12.7, 5(4x, f12.7, 1x, f12.7))
500 format(/ 'Maximum Error: ', e12.5)
600 format(157('-'))
700 format('Overall Maximum Error: ', e12.5 / 157('-'))
end subroutine outer1Check_BOUNDARY
!=====
subroutine outer1Check_CARTESIAN(arg_p,arg_f)
implicit none
real(DP), dimension(2), intent(in) :: arg_p
real(DP), dimension(0:3), intent(out) :: arg_f
real(DP), dimension(3,0:3) :: f
integer :: k
do k = 1, 3
    call sav_outer1%SetSolution(k)
    call sav_outer1%Cartesian(arg_p,f(k,:))
end do
arg_f = matmul(sav_c,f)
end subroutine outer1Check_CARTESIAN
!=====
subroutine outer1Check_POLAR(arg_r,arg_t,arg_pr,arg_vr,arg_vt,arg_st)
implicit none
real(DP), intent(in) :: arg_r, arg_t
real(DP), intent(out) :: arg_st, arg_pr, arg_vr, arg_vt
real(DP), dimension(3) :: st, pr, vr, vt
integer :: k
do k = 1, 3
    call sav_outer1%SetSolution(k)
    call sav_outer1%Polar(arg_r,arg_t,pr(k),vr(k),vt(k),st(k))
end do
arg_pr = dot_product(sav_c,pr)
arg_vr = dot_product(sav_c,vr)
arg_vt = dot_product(sav_c,vt)
arg_st = dot_product(sav_c,st)
end subroutine outer1Check_POLAR
!=====
end module mod_outer1Check

```

```

#####
! Copyright 2013 by Ludwig C. Nitsche
!-----
module mod_outerBuild
use mod_constants
use mod_outer0
use mod_genSol
implicit none
private
public :: outerBuild_Boundary
public :: outerBuild_Cartesian
public :: outerBuild_Polar
type(typ_outer0) :: sav_outer0
contains
=====
  subroutine outerBuild_Boundary(arg_k,arg_w,arg_pr,arg_vr,arg_vt,arg_st)
    integer,          intent(in)  :: arg_k
    real(DP),         intent(out)  :: arg_w
    real(DP), dimension(0:2), intent(out) :: arg_pr, arg_vr, arg_vt, arg_st
    arg_pr = 0.0_DP
    arg_vr = 0.0_DP
    arg_vt = 0.0_DP
    arg_st = 0.0_DP
    if (arg_k == 1) then
      call sav_outer0%Boundary(arg_pr(0),arg_vr(0),arg_vt(0),arg_st(0))
      arg_w = 0.0_DP
    else if (arg_k == 2) then
      arg_st(1) = 2.0_DP
      arg_pr(0) = PI / 2.0_DP
      arg_vt(0) = 1.0_DP
      arg_w = -1.0_DP
    else if (arg_k == 3) then
      arg_pr(0) = 1.0_DP
      arg_vr(0) = 1.0_DP
      arg_w = -1.0_DP
    else if (arg_k == 4) then
      arg_st(0) = 4.0_DP
      arg_w = -1.0_DP
    else if (arg_k == 5) then
      arg_st(0) = -6.0_DP
      arg_vt(0) = 1.0_DP
      arg_w = -2.0_DP
    else if (arg_k == 6) then
      arg_st(1) = -6.0_DP
      arg_st(0) = 2.0_DP
      arg_pr(0) = PI / 2.0_DP
      arg_vt(1) = 1.0_DP
      arg_w = -2.0_DP
    else if (arg_k == 7) then
      arg_pr(0) = 2.0_DP
      arg_vr(0) = 1.0_DP
      arg_w = -2.0_DP
    else if (arg_k == 8) then
      arg_st(0) = -PI / 2.0_DP
      arg_pr(1) = 2.0_DP
      arg_vr(1) = 1.0_DP
      arg_w = -2.0_DP
    else if (arg_k == 9) then
      arg_st(0) = -9.0_DP
      arg_vt(0) = 1.0_DP

```

```

    arg_w = -3.0_DP
  else if (arg_k == 10) then
    arg_st(1) = -9.0_DP
    arg_st(0) = 3.0_DP / 2.0_DP
    arg_pr(0) = -3.0_DP * PI / 8.0_DP
    arg_vt(1) = 1.0_DP
    arg_w = -3.0_DP
  else if (arg_k == 11) then
    arg_pr(0) = 3.0_DP / 2.0_DP
    arg_vr(0) = 1.0_DP
    arg_w = -3.0_DP
  else if (arg_k == 12) then
    arg_st(0) = 3.0_DP * PI / 8.0_DP
    arg_pr(1) = 3.0_DP / 2.0_DP
    arg_pr(0) = -1.0_DP / 8.0_DP
    arg_vr(1) = 1.0_DP
    arg_w = -3.0_DP
  else if (arg_k == 13) then
    arg_st(0) = -10.0_DP
    arg_vt(0) = 1.0_DP
    arg_w = -4.0_DP
  else if (arg_k == 14) then
    arg_st(1) = -10.0_DP
    arg_st(0) = 2.0_DP
    arg_pr(0) = PI / 4.0_DP
    arg_vt(1) = 1.0_DP
    arg_w = -4.0_DP
  else if (arg_k == 15) then
    arg_pr(0) = 2.0_DP
    arg_vr(0) = 1.0_DP
    arg_w = -4.0_DP
  else if (arg_k == 16) then
    arg_st(0) = -PI / 4.0_DP
    arg_pr(1) = 2.0_DP
    arg_vr(1) = 1.0_DP
    arg_w = -4.0_DP
  else if (arg_k == 17) then
    arg_st(0) = -25.0_DP / 2.0_DP
    arg_vt(0) = 1.0_DP
    arg_w = -5.0_DP
  else if (arg_k == 18) then
    arg_st(1) = -25.0_DP / 2.0_DP
    arg_st(0) = 15.0_DP / 8.0_DP
    arg_pr(0) = -PI * 5.0_DP / 24.0_DP
    arg_vt(1) = 1.0_DP
    arg_w = -5.0_DP
  else if (arg_k == 19) then
    arg_pr(0) = 5.0_DP / 3.0_DP
    arg_vr(0) = 1.0_DP
    arg_w = -5.0_DP
  else if (arg_k == 20) then
    arg_st(0) = PI * 5.0_DP / 24.0_DP
    arg_pr(1) = 5.0_DP / 3.0_DP
    arg_pr(0) = -1.0_DP / 18.0_DP
    arg_vr(1) = 1.0_DP
    arg_w = -5.0_DP
  else
    print*, 'Error in {outerBuild_Boundary}'
    stop
  end if

```

```

end subroutine outerBuild_Boundary
=====
subroutine outerBuild_Cartesian(arg_k,arg_p,arg_f)
implicit none
integer,          intent(in)  :: arg_k
real(DP), dimension(2), intent(in)  :: arg_p
real(DP), dimension(0:3), intent(out) :: arg_f
real(DP), dimension(12)          :: d
real(DP)           :: w
if (arg_k == 1) then
  call sav_outer0%Cartesian(arg_p,arg_f)
else
  call outerBuild_COEFFICIENTS(arg_k,w,d)
  call gensol_Cartesian(w,d,arg_p,arg_f)
end if
end subroutine outerBuild_Cartesian
=====
subroutine outerBuild_Polar(arg_k,arg_r,arg_t,arg_pr,arg_vr,arg_vt,arg_st)
implicit none
integer, intent(in)  :: arg_k
real(DP), intent(in)  :: arg_r, arg_t
real(DP), intent(out) :: arg_st, arg_pr, arg_vr, arg_vt
real(DP), dimension(12) :: d
real(DP)           :: w
if (arg_k == 1) then
  call sav_outer0%Polar(arg_r,arg_t,arg_pr,arg_vr,arg_vt,arg_st)
else
  call outerBuild_COEFFICIENTS(arg_k,w,d)
  call genSol_Polar(w,d,arg_r,arg_t,arg_pr,arg_vr,arg_vt,arg_st)
end if
end subroutine outerBuild_Polar
=====
subroutine outerBuild_COEFFICIENTS(arg_k,arg_w,arg_d)
integer,          intent(in)  :: arg_k
real(DP),          intent(out) :: arg_w
real(DP), dimension(12), intent(out) :: arg_d
arg_d = 0.0_DP
if (arg_k == 2) then
  arg_d( 5) = 0.5_DP
  arg_d( 7) = 0.5_DP
  arg_d( 9) = 1.0_DP
  arg_d(10) = -PI / 8.0_DP
  arg_d(11) =  PI / 4.0_DP
  arg_w = -1.0_DP
else if (arg_k == 3) then
  arg_d(10) = -0.25_DP
  arg_d(11) = -0.5_DP
  arg_w = -1.0_DP
else if (arg_k == 4) then
  arg_d(9) = 1.0_DP
  arg_w = -1.0_DP
else if (arg_k == 5) then
  arg_d( 9) = -0.75_DP
  arg_d(11) = -0.25_DP
  arg_w = -2.0_DP
else if (arg_k == 6) then
  arg_d( 5) = -0.75_DP
  arg_d( 7) = -0.25_DP
  arg_d( 9) = -0.875_DP
  arg_d(10) = -PI / 16.0_DP * 3.0_DP

```

```

    arg_d(11) = -0.125_DP
    arg_d(12) = PI / 16.0_DP
    arg_w = -2.0_DP
else if (arg_k == 7) then
    arg_d(10) = 0.25_DP
    arg_d(12) = 0.25_DP
    arg_w = -2.0_DP
else if (arg_k == 8) then
    arg_d( 6) = 0.25_DP
    arg_d( 8) = 0.25_DP
    arg_d( 9) = PI / 16.0_DP
    arg_d(10) = 0.125_DP
    arg_d(11) = -PI / 16.0_DP
    arg_d(12) = 0.125_DP
    arg_w = -2.0_DP
else if (arg_k == 9) then
    arg_d( 9) = -0.25_DP
    arg_d(11) = -0.25_DP
    arg_w = -3.0_DP
else if (arg_k == 10) then
    arg_d( 5) = -0.25_DP
    arg_d( 7) = -0.25_DP
    arg_d( 9) = -0.125_DP
    arg_d(10) = PI / 16.0_DP
    arg_d(11) = -0.125_DP
    arg_d(12) = -PI / 32.0_DP
    arg_w = -3.0_DP
else if (arg_k == 11) then
    arg_d(10) = 0.25_DP
    arg_d(12) = 0.125_DP
    arg_w = -3.0_DP
else if (arg_k == 12) then
    arg_d( 6) = 1.0_DP / 4.0_DP
    arg_d( 8) = 1.0_DP / 8.0_DP
    arg_d( 9) = -PI / 32.0_DP
    arg_d(10) = 1.0_DP / 8.0_DP
    arg_d(11) = PI / 32.0_DP
    arg_d(12) = 1.0_DP / 32.0_DP
    arg_w = -3.0_DP
else if (arg_k == 13) then
    arg_d( 9) = -5.0_DP / 24.0_DP
    arg_d(11) = -1.0_DP / 8.0_DP
    arg_w = -4.0_DP
else if (arg_k == 14) then
    arg_d( 5) = - 5.0_DP / 24.0_DP
    arg_d( 7) = - 1.0_DP / 8.0_DP
    arg_d( 9) = - 23.0_DP / 288.0_DP
    arg_d(10) = -PI * 15.0_DP / 576.0_DP
    arg_d(11) = - 1.0_DP / 32.0_DP
    arg_d(12) = PI / 64.0_DP
    arg_w = -4.0_DP
else if (arg_k == 15) then
    arg_d(10) = 1.0_DP / 8.0_DP
    arg_d(12) = 1.0_DP / 8.0_DP
    arg_w = -4.0_DP
else if (arg_k == 16) then
    arg_d( 6) = 1.0_DP / 8.0_DP
    arg_d( 8) = 1.0_DP / 8.0_DP
    arg_d( 9) = PI / 64.0_DP
    arg_d(10) = 1.0_DP / 32.0_DP

```

```

    arg_d(11) = -PI      / 64.0_DP
    arg_d(12) =  1.0_DP / 32.0_DP
    arg_w = -4.0_DP
  else if (arg_k == 17) then
    arg_d( 9) = -1.0_DP / 8.0_DP
    arg_d(11) = -1.0_DP / 8.0_DP
    arg_w = -5.0_DP
  else if (arg_k == 18) then
    arg_d( 5) = -1.0_DP / 8.0_DP
    arg_d( 7) = -1.0_DP / 8.0_DP
    arg_d( 9) = -1.0_DP / 32.0_DP
    arg_d(10) =  PI      / 64.0_DP
    arg_d(11) = -1.0_DP / 32.0_DP
    arg_d(12) = -PI      / 96.0_DP
    arg_w = -5.0_DP
  else if (arg_k == 19) then
    arg_d(10) = 1.0_DP / 8.0_DP
    arg_d(12) = 1.0_DP / 12.0_DP
    arg_w = -5.0_DP
  else if (arg_k == 20) then
    arg_d( 6) = 1.0_DP / 8.0_DP
    arg_d( 8) = 1.0_DP / 12.0_DP
    arg_d( 9) = -PI      / 96.0_DP
    arg_d(10) = 1.0_DP / 32.0_DP
    arg_d(11) =  PI      / 96.0_DP
    arg_d(12) = 1.0_DP / 72.0_DP
    arg_w = -5.0_DP
  else
    print*, 'Error in {outerBuild_COEFFICIENTS}'
    print*, arg_k
    stop
  end if
end subroutine outerBuild_COEFFICIENTS
!=====
end module mod_outerBuild
!#####
! Copyright 2013 by Ludwig C. Nitsche
!-----
module mod_outerBuildCheck
use mod_constants
use mod_stokesEq2d
use mod_outerBuild
implicit none
private
public :: outerBuildCheck
real(DP), dimension(20) :: sav_c
contains
!=====
  subroutine outerBuildCheck
    call random_number(sav_c)
    print 100, sav_c
    call stokesEq2d_Cartesian(outerBuildCheck_CARTESIAN,'outerBuild_Cartesian.txt')
    call stokesEq2d_Polar(outerBuildCheck_POLAR,'outerBuild_Polar.txt')
    call outerBuildCheck_BOUNDARY
100 format(/ 'outerBuildCheck: Random Coefficients' / 20(f12.7 /) /)
  end subroutine outerBuildCheck
!=====
  subroutine outerBuildCheck_BOUNDARY
    integer          :: i, iMax, k
    real(DP)         :: r, rMax, rMin, w, t

```



```

real(DP)           :: st1, pr1, vr1, vt1
real(DP)           :: st2, pr2, vr2, vt2
real(DP)           :: st3, pr3, vr3, vt3
real(DP)           :: error, maxErrorMax
real(DP), dimension(20) :: errorMax
real(DP), dimension(0:2) :: pr, vr, vt, st
open(unit = 20, file = 'outerBuild_Boundary.txt')
rMin = 0.5_DP
rMax = 1.5_DP
iMax = 10
do k = 1, 20
  call outerBuild_Boundary(k,w,pr,vr,vt,st)
  write(20,100) k
  write(20,200) 'st', st(2), st(1), st(0), w - 1.0_DP
  if (k == 1) then
    write(20,250) 'pr', pr(2), pr(1), pr(0), w - 1.0_DP
  else
    write(20,200) 'pr', pr(2), pr(1), pr(0), w - 1.0_DP
  end if
  write(20,200) 'vr', vr(2), vr(1), vr(0), w
  write(20,200) 'vt', vt(2), vt(1), vt(0), w
  write(20,300)
  errorMax(k) = 0.0_DP
  do i = 0, iMax
    r = rMin + (rMax - rMin) * real(i,DP) / real(iMax,DP)
    st1 = (st(2) * log(r)**2 + st(1) * log(r) + st(0)) * r**(w - 1.0_DP)
    pr1 = (pr(2) * log(r)**2 + pr(1) * log(r) + pr(0)) * r**(w - 1.0_DP)
    vr1 = (vr(2) * log(r)**2 + vr(1) * log(r) + vr(0)) * r**w
    vt1 = (vt(2) * log(r)**2 + vt(1) * log(r) + vt(0)) * r**w
    if (k == 1) then
      pr1 = pr1 + 1.0_DP
    end if
    t = 0.0_DP
    call outerBuild_Polar(k,r,t,pr2,vr2,vt2,st2)
    t = PI / 2.0_DP
    call outerBuild_Polar(k,r,t,pr3,vr3,vt3,st3)
    write(20,400) r, vr3, vt3, st1, st2, pr1, pr2, vr1, vr2, vt1, vt2
    error = max(abs(vr3),abs(vt3),abs(st1-st2),abs(pr1-pr2),abs(vr1-vr2),abs(vt1-vt2))
    if (error > errorMax(k)) then
      errorMax(k) = error
    end if
  end do
  write(20,500) errorMax(k)
end do
write(20,600)
maxErrorMax = maxval(errorMax)
write(20,700) maxErrorMax
close(20)
100 format (157('-')) / 'Outer Solution Building Block: ', i2 /)
200 format (a, '(r,0) = [ (', f10.6, ') ln(r)^2 + (', f10.6, ') ln(r) + (', f10.6, ') ] r^(', f4.1, ')')
250 format (a, '(r,0) = [ (', f10.6, ') ln(r)^2 + (', f10.6, ') ln(r) + (', f10.6, ') ] r^(', f4.1, ') + 1')
300 format (/ '
      r', 4x, ' vr(r,90)', 1x, ' vt(r,90)', 4x, &
      ' stress(r,0)', 1x, ' stess(r,0)', 4x, ' pr(r,0)', 1x, &
      ' pr(r,0)', 4x, ' vr(r,0)', 1x, ' vr(r,0)', 4x, &
      ' vt(r,0)', 1x, ' vt(r,0)' /
      12('-'), 5(4x, 12('-'), 1x, 12('-'))
400 format(f12.7, 5(4x, f12.7, 1x, f12.7))
500 format(/ 'Maximum Error: ', e12.5)
600 format(157('-'))
700 format('Overall Maximum Error: ', e12.5 / 157('-'))

```

```

    end subroutine outerBuildCheck_BOUNDARY
!=====
subroutine outerBuildCheck_CARTESIAN(arg_p,arg_f)
implicit none
real(DP), dimension(2), intent(in) :: arg_p
real(DP), dimension(0:3), intent(out) :: arg_f
real(DP), dimension(20,0:3) :: f
integer :: k
do k = 1, 20
    call outerBuild_Cartesian(k,arg_p,f(k,:))
end do
arg_f = matmul(sav_c,f)
end subroutine outerBuildCheck_CARTESIAN
!=====
subroutine outerBuildCheck_POLAR(arg_r,arg_t,arg_pr,arg_vr,arg_vt,arg_st)
implicit none
real(DP), intent(in) :: arg_r, arg_t
real(DP), intent(out) :: arg_st, arg_pr, arg_vr, arg_vt
real(DP), dimension(20) :: st, pr, vr, vt
integer :: k
do k = 1, 20
    call outerBuild_Polar(k,arg_r,arg_t,pr(k),vr(k),vt(k),st(k))
end do
arg_pr = dot_product(sav_c,pr)
arg_vr = dot_product(sav_c,vr)
arg_vt = dot_product(sav_c,vt)
arg_st = dot_product(sav_c,st)
end subroutine outerBuildCheck_POLAR
!=====
end module mod_outerBuildCheck
!#####
! Copyright 2013 by Ludwig C. Nitsche
!-----
module mod_innerBuild
use mod_constants
use mod_genSol
implicit none
private
public :: innerBuild_Boundary
public :: innerBuild_Cartesian
public :: innerBuild_Polar
contains
!=====
subroutine innerBuild_Boundary(arg_k,arg_w,arg_pr,arg_vr,arg_vt,arg_st)
integer, intent(in) :: arg_k
real(DP), intent(out) :: arg_w
real(DP), dimension(0:2), intent(out) :: arg_pr, arg_vr, arg_vt, arg_st
arg_pr = 0.0_DP
arg_vr = 0.0_DP
arg_vt = 0.0_DP
arg_st = 0.0_DP
if (arg_k == 1) then
    arg_vr(0) = 0.5_DP
    arg_vt(0) = 1.0_DP
    arg_w = 0.5_DP
else if (arg_k == 2) then
    arg_pr(0) = 1.0_DP
    arg_vr(0) = 1.0_DP / 4.0_DP
    arg_vt(0) = 1.0_DP / 6.0_DP
    arg_w = 1.5_DP

```

```
else if (arg_k == 3) then
  arg_st(0) = 1.0_DP
  arg_vr(0) = -1.0_DP / 6.0_DP
  arg_vt(0) = 2.0_DP / 3.0_DP
  arg_w = 1.5_DP
else if (arg_k == 4) then
  arg_pr(0) = 1.0_DP
  arg_vr(0) = 3.0_DP / 8.0_DP
  arg_vt(0) = -1.0_DP / 20.0_DP
  arg_w = 2.5_DP
else if (arg_k == 5) then
  arg_st(0) = 1.0_DP
  arg_vr(0) = 1.0_DP / 20.0_DP
  arg_vt(0) = 3.0_DP / 10.0_DP
  arg_w = 2.5_DP
else if (arg_k == 6) then
  arg_pr(0) = 1.0_DP
  arg_vr(0) = 5.0_DP / 12.0_DP
  arg_vt(0) = 1.0_DP / 42.0_DP
  arg_w = 3.5_DP
else if (arg_k == 7) then
  arg_st(0) = 1.0_DP
  arg_vr(0) = -1.0_DP / 42.0_DP
  arg_vt(0) = 4.0_DP / 21.0_DP
  arg_w = 3.5_DP
else if (arg_k == 8) then
  arg_pr(0) = 1.0_DP
  arg_vr(0) = 7.0_DP / 16.0_DP
  arg_vt(0) = -1.0_DP / 72.0_DP
  arg_w = 4.5_DP
else if (arg_k == 9) then
  arg_st(0) = 1.0_DP
  arg_vr(0) = 1.0_DP / 72.0_DP
  arg_vt(0) = 5.0_DP / 36.0_DP
  arg_w = 4.5_DP
else if (arg_k == 10) then
  arg_pr(0) = 1.0_DP
  arg_vr(0) = 9.0_DP / 20.0_DP
  arg_vt(0) = 1.0_DP / 110.0_DP
  arg_w = 5.5_DP
else if (arg_k == 11) then
  arg_st(0) = 1.0_DP
  arg_vr(0) = -1.0_DP / 110.0_DP
  arg_vt(0) = 54.0_DP / 495.0_DP
  arg_w = 5.5_DP
else if (arg_k == 12) then
  arg_pr(0) = 1.0_DP
  arg_vr(0) = 11.0_DP / 24.0_DP
  arg_vt(0) = -1.0_DP / 156.0_DP
  arg_w = 6.5_DP
else if (arg_k == 13) then
  arg_st(0) = 1.0_DP
  arg_vr(0) = 1.0_DP / 156.0_DP
  arg_vt(0) = 19943.0_DP / 222222.0_DP
  arg_w = 6.5_DP
else
  print*, 'Error in {innerBuild_Boundary}'
  stop
end if
end subroutine innerBuild_Boundary
```

```

=====
subroutine innerBuild_Cartesian(arg_k,arg_p,arg_f)
implicit none
integer,          intent(in)  :: arg_k
real(DP), dimension(2), intent(in)  :: arg_p
real(DP), dimension(0:3), intent(out) :: arg_f
real(DP), dimension(12)          :: d
real(DP)           :: w
call innerBuild_COEFFICIENTS(arg_k,w,d)
call gensol_Cartesian(w,d,arg_p,arg_f)
end subroutine innerBuild_Cartesian
=====

subroutine innerBuild_Polar(arg_k,arg_r,arg_t,arg_pr,arg_vr,arg_vt,arg_st)
implicit none
integer, intent(in)  :: arg_k
real(DP), intent(in)  :: arg_r, arg_t
real(DP), intent(out) :: arg_st, arg_pr, arg_vr, arg_vt
real(DP), dimension(12) :: d
real(DP)           :: w
call innerBuild_COEFFICIENTS(arg_k,w,d)
call genSol_Polar(w,d,arg_r,arg_t,arg_pr,arg_vr,arg_vt,arg_st)
end subroutine innerBuild_Polar
=====

subroutine innerBuild_COEFFICIENTS(arg_k,arg_w,arg_d)
integer,          intent(in)  :: arg_k
real(DP),          intent(out) :: arg_w
real(DP), dimension(12), intent(out) :: arg_d
arg_d = 0.0_DP
if (arg_k == 1) then
  arg_d( 9) = 1.0_DP / 6.0_DP
  arg_d(10) = -1.0_DP / 3.0_DP
  arg_d(11) = 1.0_DP / 2.0_DP
  arg_w = 0.5_DP
else if (arg_k == 2) then
  arg_d( 9) = -1.0_DP / 60.0_DP
  arg_d(10) = -1.0_DP / 15.0_DP
  arg_d(11) = 1.0_DP / 12.0_DP
  arg_d(12) = -1.0_DP / 6.0_DP
  arg_w = 1.5_DP
else if (arg_k == 3) then
  arg_d( 9) = 1.0_DP / 10.0_DP
  arg_d(10) = 1.0_DP / 15.0_DP
  arg_d(11) = 1.0_DP / 6.0_DP
  arg_w = 1.5_DP
else if (arg_k == 4) then
  arg_d( 9) = 3.0_DP / 280.0_DP
  arg_d(10) = -9.0_DP / 140.0_DP
  arg_d(11) = -1.0_DP / 40.0_DP
  arg_d(12) = -1.0_DP / 10.0_DP
  arg_w = 2.5_DP
else if (arg_k == 5) then
  arg_d( 9) = 1.0_DP / 28.0_DP
  arg_d(10) = -1.0_DP / 70.0_DP
  arg_d(11) = 1.0_DP / 20.0_DP
  arg_w = 2.5_DP
else if (arg_k == 6) then
  arg_d( 9) = - 5.0_DP / 756.0_DP
  arg_d(10) = -10.0_DP / 189.0_DP
  arg_d(11) = 1.0_DP / 84.0_DP
  arg_d(12) = - 1.0_DP / 14.0_DP

```

```

    arg_w = 3.5_DP
  else if (arg_k == 7) then
    arg_d( 9) = 1.0_DP / 54.0_DP
    arg_d(10) = 1.0_DP / 189.0_DP
    arg_d(11) = 1.0_DP / 42.0_DP
    arg_w = 3.5_DP
  else if (arg_k == 8) then
    arg_d( 9) = 7.0_DP / 1584.0_DP
    arg_d(10) = -35.0_DP / 792.0_DP
    arg_d(11) = - 1.0_DP / 144.0_DP
    arg_d(12) = - 1.0_DP / 18.0_DP
    arg_w = 4.5_DP
  else if (arg_k == 9) then
    arg_d( 9) = 1.0_DP / 88.0_DP
    arg_d(10) = -1.0_DP / 396.0_DP
    arg_d(11) = 1.0_DP / 72.0_DP
    arg_w = 4.5_DP
  else if (arg_k == 10) then
    arg_d( 9) = - 9.0_DP / 2860.0_DP
    arg_d(10) = -27.0_DP / 715.0_DP
    arg_d(11) = 1.0_DP / 220.0_DP
    arg_d(12) = - 1.0_DP / 22.0_DP
    arg_w = 5.5_DP
  else if (arg_k == 11) then
    arg_d( 9) = 1.0_DP / 130.0_DP
    arg_d(10) = 1.0_DP / 715.0_DP
    arg_d(11) = 1.0_DP / 110.0_DP
    arg_w = 5.5_DP
  else if (arg_k == 12) then
    arg_d( 9) = 31339.0_DP / 13333320.0_DP
    arg_d( 9) = 31339.0_DP / (120.0_DP * 111111.0_DP)
    arg_d(10) = -31339.0_DP * 7.0_DP / ( 60.0_DP * 111111.0_DP)
    arg_d(11) = -1.0_DP / 312.0_DP
    arg_d(12) = -1.0_DP / 26.0_DP
    arg_w = 6.5_DP
  else if (arg_k == 13) then
    arg_d( 9) = 1.0_DP / 180.0_DP
    arg_d(10) = -1.0_DP / 1170.0_DP
    arg_d(11) = 1.0_DP / 156.0_DP
    arg_w = 6.5_DP
  else
    print*, 'Error in {innerBuild_COEFFICIENTS}'
    print*, arg_k
    stop
  end if
end subroutine innerBuild_COEFFICIENTS
!=====
end module mod_innerBuild
!#####
! Copyright 2013 by Ludwig C. Nitsche
!-----
module mod_innerBuildCheck
use mod_constants
use mod_stokesEq2d
use mod_innerBuild
implicit none
private
public :: innerBuildCheck
real(DP), dimension(13) :: sav_c
contains

```

```

=====
subroutine innerBuildCheck
call random_number(sav_c)
print 100, sav_c
call stokesEq2d_Cartesian(innerBuildCheck_CARTESIAN,'innerBuild_Cartesian.txt')
call stokesEq2d_Polar(innerBuildCheck_POLAR,'innerBuild_Polar.txt')
call innerBuildCheck_BOUNDARY
100 format(/ 'innerBuildCheck: Random Coefficients' / 13(f12.7 /) /)
end subroutine innerBuildCheck
=====
subroutine innerBuildCheck_BOUNDARY
integer          :: i, iMax, k
real(DP)         :: r, rMax, rMin, w, t
real(DP)         :: st1, pr1, vr1, vt1
real(DP)         :: st2, pr2, vr2, vt2
real(DP)         :: st3, pr3, vr3, vt3
real(DP)         :: error, maxErrorMax
real(DP), dimension(13) :: errorMax
real(DP), dimension(0:2) :: pr, vr, vt, st
open(unit = 20, file = 'innerBuild_Boundary.txt')
rMin = 0.5_DP
rMax = 1.5_DP
iMax = 10
do k = 1, 13
call innerBuild_Boundary(k,w,pr,vr,vt,st)
write(20,100) k
write(20,200) 'st', st(2), st(1), st(0), w - 1.0_DP
write(20,200) 'pr', pr(2), pr(1), pr(0), w - 1.0_DP
write(20,200) 'vr', vr(2), vr(1), vr(0), w
write(20,200) 'vt', vt(2), vt(1), vt(0), w
write(20,300)
errorMax(k) = 0.0_DP
do i = 0, iMax
r = rMin + (rMax - rMin) * real(i,DP) / real(iMax,DP)
st1 = (st(2) * log(r)**2 + st(1) * log(r) + st(0)) * r**(w - 1.0_DP)
pr1 = (pr(2) * log(r)**2 + pr(1) * log(r) + pr(0)) * r**(w - 1.0_DP)
vr1 = (vr(2) * log(r)**2 + vr(1) * log(r) + vr(0)) * r**w
vt1 = (vt(2) * log(r)**2 + vt(1) * log(r) + vt(0)) * r**w
t = 0.0_DP
call innerBuild_Polar(k,r,t,pr2,vr2,vt2,st2)
t = PI / 2.0_DP
call innerBuild_Polar(k,r,t,pr3,vr3,vt3,st3)
write(20,400) r, vr3, vt3, st1, st2, pr1, pr2, vr1, vr2, vt1, vt2
error = max(abs(vr3),abs(vt3),abs(st1-st2),abs(pr1-pr2),abs(vr1-vr2),abs(vt1-vt2))
if (error > errorMax(k)) then
errorMax(k) = error
end if
end do
write(20,500) errorMax(k)
end do
write(20,600)
maxErrorMax = maxval(errorMax)
write(20,700) maxErrorMax
close(20)
100 format (157('-') / 'Inner Solution Building Block: ', i2 /)
200 format (a, '(r,0) = [ (', f10.6, ') ln(r)^2 + (', f10.6, ') ln(r) + (', f10.6, ') ] r^(', f4.1, ')')'
300 format (/ '
', r', 4x, ', vr(r,90)', 1x, ', vt(r,90)', 4x, &
', stress(r,0)', 1x, ', stess(r,0)', 4x, ', pr(r,0)', 1x, &
', pr(r,0)', 4x, ', vr(r,0)', 1x, ', vr(r,0)', 4x, &
', vt(r,0)', 1x, ', vt(r,0)' /
&

```

```

12('-',), 5(4x, 12('-',), 1x, 12('-',)))
400 format(f12.7, 5(4x, f12.7, 1x, f12.7))
500 format(/ 'Maximum Error: ', e12.5)
600 format(157('-',))
700 format('Overall Maximum Error: ', e12.5 / 157('-',))
end subroutine innerBuildCheck_BOUNDARY
!=====
subroutine innerBuildCheck_CARTESIAN(arg_p,arg_f)
implicit none
real(DP), dimension(2), intent(in) :: arg_p
real(DP), dimension(0:3), intent(out) :: arg_f
real(DP), dimension(13,0:3) :: f
real(DP), dimension(13) :: c
integer :: k
do k = 1, 13
call innerBuild_Cartesian(k,arg_p,f(k,:))
end do
arg_f = matmul(sav_c,f)
end subroutine innerBuildCheck_CARTESIAN
!=====
subroutine innerBuildCheck_POLAR(arg_r,arg_t,arg_pr,arg_vr,arg_vt,arg_st)
implicit none
real(DP), intent(in) :: arg_r, arg_t
real(DP), intent(out) :: arg_st, arg_pr, arg_vr, arg_vt
real(DP), dimension(13) :: st, pr, vr, vt
integer :: k
do k = 1, 13
call innerBuild_Polar(k,arg_r,arg_t,pr(k),vr(k),vt(k),st(k))
end do
arg_pr = dot_product(sav_c,pr)
arg_vr = dot_product(sav_c,vr)
arg_vt = dot_product(sav_c,vt)
arg_st = dot_product(sav_c,st)
end subroutine innerBuildCheck_POLAR
!=====
end module mod_innerBuildCheck
!#####
! Copyright 2013 by Ludwig C. Nitsche
!-----
module mod_similarity
use mod_constants
use mod_utilities
use mod_fullmat
implicit none
private
public :: similarity_determinant
public :: similarity_power
public :: similarity_Coefficients
public :: similarity_Boundary
public :: similarity_Cartesian
public :: similarity_Polar
real(DP), parameter :: SAV_TOL = 1.0e-10_DP
contains
!=====
function similarity_determinant(arg_angle,arg_w) result(arg_f)
implicit none
real(DP), parameter :: TOL = 1.0e-8_DP
integer, intent(in) :: arg_angle
real(DP), intent(in) :: arg_w
real(DP) :: arg_f

```

```

real(DP), dimension(4)  :: fp, fr, ft, fs
real(DP), dimension(4)  :: gp, gr, gt, gs
real(DP), dimension(4,4) :: a
real(DP)                :: t1, t2
t1 = 0.0_DP
t2 = arg_angle * PI / 180.0_DP
if (abs(arg_w - 1.0_DP) < TOL) then
  call similarity_FUNCTIONS_PLUS_1(t1,fp,fr,ft,fs)
  call similarity_FUNCTIONS_PLUS_1(t2,gp,gr,gt,gs)
else
  call similarity_FUNCTIONS(t1,arg_w,fp,fr,ft,fs)
  call similarity_FUNCTIONS(t2,arg_w,gp,gr,gt,gs)
end if
a(1,:) = gr
a(2,:) = gt
a(3,:) = fp
a(4,:) = fs
arg_f = det4(a)
end function similarity_determinant
=====
function similarity_power(arg_angle,opt_k) result(arg_w)
implicit none
integer, intent(in)      :: arg_angle
integer, intent(in), optional :: opt_k
real(DP)                :: arg_w
real(DP)                :: wL, wM, wH
real(DP)                :: dL, dM, dH
real(DP)                :: tol
tol = SAV_TOL / 10.0_DP
if (arg_angle < 10) then
  print*, 'Error #1 in {similarity_power}'
  stop
else if (arg_angle < 20) then
  wL = 2.0_DP
  wH = 7.0_DP
else if (arg_angle < 45) then
  wL = 1.001_DP
  wH = 4.0_DP
else if (arg_angle == 45) then
  arg_w = 1.0_DP
  return
else if (arg_angle < 90) then
  wL = 0.4_DP
  wH = 0.999_DP
else if (arg_angle == 135) then
  if (present(opt_k)) then
    if (opt_k == 1) then
      wL = 0.4_DP
      wH = 0.5_DP
    else if (opt_k == 2) then
      arg_w = 1.0_DP
      return
    else
      wL = 1.5_DP
      wH = 1.6_DP
    end if
  else
    wL = 0.4_DP
    wH = 0.5_DP
  end if
end if

```



```

else if (arg_angle < 180) then
    wL = 0.4_DP
    wH = 0.505_DP
else
    print*, 'Error #2 in {similarity_power}'
    stop
end if
dL = similarity_determinant(arg_angle,wL)
dH = similarity_determinant(arg_angle,wH)
if (dL * dH <= 0.0_DP) then
10    wM = (wL + wH) / 2.0_DP
    dM = similarity_determinant(arg_angle,wM)
    if (wH - wL > tol .or. abs(dM) > tol) then
        if (dL * dM > 0.0_DP) then
            wL = wM
        else
            wH = wM
        end if
        goto 10
    else
        arg_w = wM
    end if
else
    print*, 'Error in {similarity_power}'
    print*, 'Interval does not bracket root'
    stop
end if
end function similarity_power
!=====
subroutine similarity_Coefficients(arg_angle,arg_w,arg_co,arg_vt,arg_vr)
implicit none
real(DP),          parameter    :: TOL = 1.0e-8_DP
integer,           intent(in)   :: arg_angle
real(DP),          intent(in)   :: arg_w
real(DP), dimension(2,4), intent(out) :: arg_co
real(DP), dimension(2),  intent(out) :: arg_vt
real(DP), dimension(2),  intent(out) :: arg_vr
real(DP), dimension(4)   :: fp, fr, ft, fs
real(DP), dimension(4)   :: gp, gr, gt, gs
real(DP), dimension(5,4) :: a
real(DP), dimension(5)   :: b
real(DP), dimension(4)   :: x
real(DP)             :: t1, t2
type(typ_fullmat)      :: z
t1 = 0.0_DP
t2 = arg_angle * PI / 180.0_DP
if (abs(arg_w - 1.0_DP) < TOL) then
    call similarity_FUNCTIONS_PLUS_1(t1,fp,fr,ft,fs)
    call similarity_FUNCTIONS_PLUS_1(t2,gp,gr,gt,gs)
else
    call similarity_FUNCTIONS(t1,arg_w,fp,fr,ft,fs)
    call similarity_FUNCTIONS(t2,arg_w,gp,gr,gt,gs)
end if
a(1,:) = gr
a(2,:) = gt
a(3,:) = fp
a(4,:) = fs
a(5,:) = ft
call z%SetMatrix(a(1:4,:))
if (abs(z%getDeterminant()) > SAV_TOL) then

```

```

      x = 0.0_DP
      x(3) = 1.0_DP
      call z%SolSystem(x)
      arg_co(1,:) = x
      arg_vt(1) = dot_product(x,ft)
      arg_vr(1) = dot_product(x,fr)
      x = 0.0_DP
      x(4) = 1.0_DP
      call z%SolSystem(x)
      arg_co(2,:) = x
      arg_vt(2) = dot_product(x,ft)
      arg_vr(2) = dot_product(x,fr)
    else
      b = 0.0
      b(5) = 1.0_DP
      call z%SetMatrix(matmul(transpose(a),a))
      x = matmul(transpose(a),b)
      call z%SolSystem(x)
      arg_co(1,:) = x
      arg_vt(1) = dot_product(x,ft)
      arg_vr(1) = dot_product(x,fr)
      arg_co(2,:) = 0.0_DP
      arg_vt(2) = 0.0_DP
      arg_vr(2) = 0.0_DP
    end if
100 format('Determinant: ', e12.5)
200 format(4(f21.14 /))
    end subroutine similarity_Coefficients
!=====
    subroutine similarity_Boundary(arg_angle,arg_w,arg_d)
    implicit none
    real(DP),          parameter  :: TOL = 1.0e-8_DP
    integer,           intent(in) :: arg_angle
    real(DP),          intent(in) :: arg_w
    real(DP), dimension(4), intent(in) :: arg_d
    real(DP), dimension(4)          :: fp, fr, ft, fs
    real(DP), dimension(4)          :: gp, gr, gt, gs
    real(DP)            :: t1, t2
    integer             :: a1, a2
    a1 = 0
    a2 = arg_angle
    t1 = real(a1,DP) * PI / 180.0_DP
    t2 = real(a2,DP) * PI / 180.0_DP
!
    if (abs(arg_w - 1.0_DP) < TOL) then
      call similarity_FUNCTIONS_PLUS_1(t1,fp,fr,ft,fs)
      call similarity_FUNCTIONS_PLUS_1(t2,gp,gr,gt,gs)
    else
      call similarity_FUNCTIONS(t1,arg_w,fp,fr,ft,fs)
      call similarity_FUNCTIONS(t2,arg_w,gp,gr,gt,gs)
    end if
!
100 format (a, '(r,', i3, ') = (', f17.10, ') r^(', f9.5, ')')
150 format (a, '(r,', i3, ') = (', f17.10, ') ln(r)')
200 format ( )
300 format (79('-'))
    end subroutine similarity_Boundary
!=====
    subroutine similarity_Cartesian(arg_w,arg_d,arg_p,arg_f)
    real(DP),          intent(in) :: arg_w

```

```

real(DP), dimension(4), intent(in) :: arg_d
real(DP), dimension(2), intent(in) :: arg_p
real(DP), dimension(0:3), intent(out) :: arg_f
real(DP) :: r, t, pr, vr, vt, st, vx, vy
r = sqrt(dot_product(arg_p, arg_p))
t = angle(arg_p)
call similarity_Polar(arg_w, arg_d, r, t, pr, vr, vt, st)
call PolarToCartesian(t, vr, vt, vx, vy)
arg_f = (/ pr, vx, vy, st /)
end subroutine similarity_Cartesian
!=====
subroutine similarity_Polar(arg_w, arg_d, arg_r, arg_t, arg_pr, arg_vr, arg_vt, arg_st)
implicit none
real(DP), parameter :: TOL = 1.0e-8_DP
real(DP), dimension(4), intent(in) :: arg_d
real(DP), intent(in) :: arg_w, arg_r, arg_t
real(DP), intent(out) :: arg_pr, arg_vr, arg_vt, arg_st
real(DP), dimension(4) :: fp, fr, ft, fs
if (arg_r < TOL) then
  arg_st = 0.0_DP
  arg_pr = 0.0_DP
  arg_vr = 0.0_DP
  arg_vt = 0.0_DP
else if (abs(arg_w - 1.0_DP) < TOL) then
  call similarity_FUNCTIONS_PLUS_1(arg_t, fp, fr, ft, fs)
  arg_st = dot_product(arg_d, fs)
  arg_pr = dot_product(arg_d, fp) * log(arg_r)
  arg_vr = dot_product(arg_d, fr) * arg_r
  arg_vt = dot_product(arg_d, ft) * arg_r
else
  call similarity_FUNCTIONS(arg_t, arg_w, fp, fr, ft, fs)
  arg_st = dot_product(arg_d, fs) * arg_r**(arg_w - 1.0_DP)
  arg_pr = dot_product(arg_d, fp) * arg_r**(arg_w - 1.0_DP)
  arg_vr = dot_product(arg_d, fr) * arg_r**arg_w
  arg_vt = dot_product(arg_d, ft) * arg_r**arg_w
end if
end subroutine similarity_Polar
!=====
subroutine similarity_FUNCTIONS_PLUS_1(arg_t, arg_fp, arg_fr, arg_ft, arg_fs)
implicit none
real(DP), intent(in) :: arg_t
real(DP), dimension(4), intent(out) :: arg_fp, arg_fr, arg_ft, arg_fs
real(DP) :: c, s
c = cos(2 * arg_t)
s = sin(2 * arg_t)
arg_fp(1) = 0.0_DP
arg_fp(2) = 0.0_DP
arg_fp(3) = 0.0_DP
arg_fp(4) = -4.0_DP
arg_fr(1) = 2.0_DP * s
arg_fr(2) = -2.0_DP * c
arg_fr(3) = 0.0_DP
arg_fr(4) = -1.0_DP
arg_ft(1) = 2.0_DP * c
arg_ft(2) = 2.0_DP * s
arg_ft(3) = 2.0_DP
arg_ft(4) = 2.0_DP * arg_t
arg_fs(1) = 4.0_DP * c
arg_fs(2) = 4.0_DP * s
arg_fs(3) = 0.0_DP

```

```

arg_fs(4) = 0.0_DP
end subroutine similarity_FUNCTIONS_PLUS_1
!=====
subroutine similarity_FUNCTIONS(arg_t,arg_w,arg_fp,arg_fr,arg_ft,arg_fs)
implicit none
real(DP),          intent(in)  :: arg_t, arg_w
real(DP), dimension(4), intent(out) :: arg_fp, arg_fr, arg_ft, arg_fs
arg_fp = -similarity_ALPHA(1,arg_t,arg_w) / (arg_w - 1.0_DP)
arg_fr = -similarity_LAMBDA(1,arg_t,arg_w)
arg_ft = (arg_w + 1.0_DP) * similarity_KAPPA(0,arg_t,arg_w)
arg_fs = similarity_KAPPA(2,arg_t,arg_w) - (1.0_DP - arg_w**2) * similarity_KAPPA(0,arg_t,arg_w)
end subroutine similarity_FUNCTIONS
!=====
function similarity_KAPPA(i,t,w) result(f)
integer, intent(in)  :: i
real(DP), intent(in) :: t, w
real(DP), dimension(4) :: f
real(DP)              :: mu, nu
mu = w + 1.0_DP
nu = w - 1.0_DP
f(1) = mu**i * cos(mu * t)
f(2) = mu**i * sin(mu * t)
f(3) = nu**i * cos(nu * t)
f(4) = nu**i * sin(nu * t)
end function similarity_KAPPA
!=====
function similarity_LAMBDA(i,t,w) result(f)
integer, intent(in)  :: i
real(DP), intent(in) :: t, w
real(DP), dimension(4) :: f
real(DP)              :: mu, nu
mu = w + 1.0_DP
nu = w - 1.0_DP
f(1) = -mu**i * sin(mu * t)
f(2) = mu**i * cos(mu * t)
f(3) = -nu**i * sin(nu * t)
f(4) = nu**i * cos(nu * t)
end function similarity_LAMBDA
!=====
function similarity_ALPHA(i,t,w) result(f)
integer, intent(in)  :: i
real(DP), intent(in) :: t, w
real(DP), dimension(4) :: f
select case(i)
case(1)
f = (w + 1.0_DP)**2 * similarity_LAMBDA(1,t,w) - similarity_LAMBDA(3,t,w)
case(2)
f = 2.0_DP * (w + 1.0_DP)**2 * (similarity_LAMBDA(0,t,w) &
- t * similarity_KAPPA(1,t,w)) - 6.0_DP * similarity_LAMBDA(2,t,w) &
+ 2.0_DP * t * similarity_KAPPA(3,t,w)
case(3)
f = 6.0_DP * (t * similarity_KAPPA(2,t,w) - similarity_LAMBDA(1,t,w)) &
+ t**2 * similarity_LAMBDA(3,t,w) - (w + 1.0_DP)**2 * t * &
(2.0_DP * similarity_KAPPA(0,t,w) + t * similarity_LAMBDA(1,t,w))
case(4)
f = t * similarity_KAPPA(3,t,w) - 3.0_DP * similarity_LAMBDA(2,t,w) &
+ (w + 1.0_DP)**2 * (similarity_LAMBDA(0,t,w) - t * similarity_KAPPA(1,t,w))
case default
f = 0.0d0
end select

```

```

    end function similarity_ALPHA
!=====
end module mod_similarity
!#####
! Copyright 2013 by Ludwig C. Nitsche
!-----
module mod_similarityCheck
use mod_constants
use mod_utilities
use mod_similarity
use mod_stokesEq2d
implicit none
private
public :: similarityCheck
real(DP)          :: sav_w
real(DP), dimension(4) :: sav_d
contains
!=====
    subroutine similarityCheck
    implicit none
    real(DP), parameter      :: TOL = 1.0e-6_DP
    integer                  :: angle
    real(DP), dimension(2,4) :: co
    real(DP), dimension(2)   :: vt, vr
    real(DP)                 :: w, wMax, wMin, wInc, power, det
    integer                  :: i, iMax, k
    integer, dimension(17)   :: angles
    character(len=3)         :: number
    sav_w = 2.7_DP
    sav_d = (/ 1.37_DP, 5.76_DP, -6.32_DP, -7.98_DP /)
    call stokesEq2d_Cartesian(similarityCheck_CARTESIAN,'similarity_Cartesian.txt')
    call stokesEq2d_Polar(similarityCheck_POLAR,'similarity_Polar.txt')
    wInc = 1.0e-3_DP
    wMin = wInc
    wMax = 10.0_DP
    iMax = nint((wMax - wMin) / wInc)
    angles = (/ 10, 15, 20, 30, 35, 40, 45, 50, 60, 90, 120, 125, 130, 135, 140, 145, 150 /)
    do k = 1, 17
        call numChar(angles(k),number)
        open(unit = 30, file = 'similarity_Determinant_' // number // '.txt')
        do i = 0, iMax
            w = wMin + (wMax - wMin) * real(i,DP) / real(iMax,DP)
            if (abs(w - 1.0_DP) < TOL) then
                cycle
            end if
            det = similarity_determinant(angles(k),w)
            write(30,100) w, log10(abs(det)), sgn(det), det
        end do
        close(30)
    end do
    open(unit = 30, file = 'similarity_Power.txt')
    do angle = 10, 179
        write(30,200) real(angle,DP), real(angle,DP) * Pi / 180.0_DP, similarity_power(angle)
    end do
    close(30)
100 format(f12.7, 5x, e12.5, 5x, f12.7, 5x, e12.5)
200 format(f5.1, 1x, f12.7, 5x, f12.7)
    end subroutine similarityCheck
!=====
    subroutine similarityCheck_CARTESIAN(arg_p,arg_f)

```

```

implicit none
real(DP), dimension(2), intent(in) :: arg_p
real(DP), dimension(0:3), intent(out) :: arg_f
call similarity_Cartesian(sav_w,sav_d,arg_p,arg_f)
end subroutine similarityCheck_CARTESIAN
!=====
subroutine similarityCheck_POLAR(arg_r,arg_t,arg_pr,arg_vr,arg_vt,arg_st)
implicit none
real(DP), intent(in) :: arg_r, arg_t
real(DP), intent(out) :: arg_pr, arg_vr, arg_vt, arg_st
call similarity_Polar(sav_w,sav_d,arg_r,arg_t,arg_pr,arg_vr,arg_vt,arg_st)
end subroutine similarityCheck_POLAR
!=====
end module mod_similarityCheck
#####
! Copyright 2013 by Ludwig C. Nitsche
!-----
module mod_innerSeries
use mod_constants
use mod_utilities
use mod_similarity
implicit none
private
type, public :: typ_innerSeries
  private
  integer :: angle = 90
  integer :: k = 1
  integer :: n = 25
  real(DP) :: s = 8.3_DP
  real(DP), dimension(:,:), allocatable :: co
  real(DP), dimension(:,:), allocatable :: vt
  real(DP), dimension(:,:), allocatable :: vr
  real(DP), dimension(:,:), allocatable :: a
  real(DP), dimension(:), allocatable :: w
contains
  procedure :: SetAngle => innerSeries_SetAngle
  procedure :: SetSolution => innerSeries_SetSolution
  procedure :: SetUrder => innerSeries_SetUrder
  procedure :: SetSlip => innerSeries_SetSlip
  procedure :: Coefficients => innerSeries_Coefficients
  procedure :: errorPressure => innerSeries_errorPressure
  procedure :: errorStress => innerSeries_errorStress
  procedure :: Boundary => innerSeries_Boundary
  procedure :: Cartesian => innerSeries_Cartesian
  procedure :: Polar => innerSeries_Polar
end type typ_innerSeries
contains
!=====
subroutine innerSeries_SetAngle(this,arg_angle)
class(typ_innerSeries), intent(inout) :: this
integer, intent(in) :: arg_angle
this%angle = arg_angle
end subroutine innerSeries_SetAngle
!=====
subroutine innerSeries_SetSolution(this,arg_k)
implicit none
class(typ_innerSeries), intent(inout) :: this
integer, intent(in) :: arg_k
this%k = clip(arg_k,1,3)
end subroutine innerSeries_SetSolution

```

```

=====
subroutine innerSeries_SetOrder(this,arg_n)
class(typ_innerSeries), intent(inout) :: this
integer, intent(in) :: arg_n
this%n = abs(arg_n)
call innerSeries_DEALLOCATE(this)
allocate(this%co(0:this%n,2,4))
allocate(this%vt(0:this%n,2))
allocate(this%vr(0:this%n,2))
allocate(this%a(0:this%n,2))
allocate(this%w(0:this%n))
end subroutine innerSeries_SetOrder
=====
subroutine innerSeries_SetSlip(this,arg_s)
class(typ_innerSeries), intent(inout) :: this
real(DP), intent(in) :: arg_s
integer :: n
this%s = abs(arg_s)
call innerSeries_RECURSION(this)
end subroutine innerSeries_SetSlip
=====
subroutine innerSeries_Coefficients(this,arg_filename)
class(typ_innerSeries), intent(inout) :: this
character(len=*), intent(in) :: arg_filename
integer :: n
open(unit = 20, file = arg_filename)
do n = 0, this%n
write(20,100) n, this%a(n,:)
end do
close(20)
100 format('n = ', i3, 4x, 'a1 = ', e17.10, 4x, 'a2 = ', e17.10)
end subroutine innerSeries_Coefficients
=====
function innerSeries_errorPressure(this,arg_r) result(arg_f)
implicit none
class(typ_innerSeries), intent(in) :: this
real(DP), intent(in) :: arg_r
real(DP) :: arg_f
arg_f = ( this%a(this%n,1) * this%vt(this%n,1) &
+ this%a(this%n,2) * this%vt(this%n,2)) * arg_r**this%w(this%n)
end function innerSeries_errorPressure
=====
function innerSeries_errorStress(this,arg_r) result(arg_f)
implicit none
class(typ_innerSeries), intent(in) :: this
real(DP), intent(in) :: arg_r
real(DP) :: arg_f
arg_f = -( this%a(this%n,1) * this%vr(this%n,1) &
+ this%a(this%n,2) * this%vr(this%n,2)) * arg_r**this%w(this%n) / this%s
end function innerSeries_errorStress
=====
subroutine innerSeries_Boundary(this,arg_filename)
implicit none
class(typ_innerSeries), intent(in) :: this
character(len=*), intent(in) :: arg_filename
integer :: i, iMax
real(DP) :: r, rMax, rMin
real(DP) :: pr, vr, vt, st
real(DP) :: e1, e2, f1, f2
real(DP) :: error1, error2, distance, cutoff

```

```

cutoff = 1.0e-2_DP
rMin = 1.0e-3_DP
rMax = 1.0e1_DP
iMax = 100
error1 = 0.0_DP
error2 = 0.0_DP
distance = 0.0_DP
open(unit = 20, file = arg_filename)
do i = 0, iMax
  r = exp(log(rMin) + log(rMax / rMin) * real(i,DP) / real(iMax,DP))
  call innerSeries_Polar(this,r,0.0_DP,pr,vr,vt,st)
  f1 = innerSeries_errorPressure(this,r)
  f2 = innerSeries_errorStress(this,r)
  e1 = pr + vt
  e2 = st - vr / this%s
  write(20,100) r, pr, vt, e1, f1, st, vr / this%s, e2, f2
  if (abs(e1 - f1) > error1) then
    error1 = abs(e1 - f1)
  end if
  if (abs(e2 - f2) > error2) then
    error2 = abs(e2 - f2)
  end if
  if (max(abs(e1),abs(e2)) > cutoff) then
    distance = r
  end if
end do
close(20)
print 200, error1, error2, distance

100 format(e12.5, 2(8x, e15.8, 1x, e15.8, 8x, e12.5, 1x, e12.5))
200 format('innerSeries: Solution' / &
          5x, 'Error1 = ', e12.5 / 5x, 'Error2 = ', e12.5 / &
          5x, 'Distance = ', e12.5 /)
end subroutine innerSeries_Boundary
!=====
subroutine innerSeries_Cartesian(this,arg_p,arg_f)
class(typ_innerSeries), intent(in) :: this
real(DP), dimension(2), intent(in) :: arg_p
real(DP), dimension(0:3), intent(out) :: arg_f
real(DP), dimension(0:3) :: f
integer :: k, n
arg_f = 0.0_DP
do n = 0, this%n
  do k = 1, 2
    call similarity_Cartesian(this%w(n),this%co(n,k,:),arg_p,f)
    arg_f = arg_f + this%a(n,k) * f
  end do
end do
end subroutine innerSeries_Cartesian
!=====
subroutine innerSeries_Polar(this,arg_r,arg_t,arg_pr,arg_vr,arg_vt,arg_st)
implicit none
class(typ_innerSeries), intent(in) :: this
real(DP), intent(in) :: arg_r, arg_t
real(DP), intent(out) :: arg_st, arg_pr, arg_vr, arg_vt
real(DP) :: st, pr, vr, vt, cs, cp
integer :: k, n
arg_pr = 0.0_DP
arg_vr = 0.0_DP
arg_vt = 0.0_DP

```



```

    arg_st = 0.0_DP
    do n = 0, this%n
        do k = 1, 2
            call similarity_Polar(this%w(n),this%co(n,k,:),arg_r,arg_t,pr,vr,vt,st)
            arg_pr = arg_pr + this%a(n,k) * pr
            arg_vr = arg_vr + this%a(n,k) * vr
            arg_vt = arg_vt + this%a(n,k) * vt
            arg_st = arg_st + this%a(n,k) * st
        end do
    end do
end subroutine innerSeries_Polar
!=====
subroutine innerSeries_RECURSION(this)
implicit none
class(typ_innerSeries), intent(inout) :: this
real(DP), dimension(0:2)                :: pr1, vr1, vt1, st1
real(DP), dimension(0:2)                :: pr2, vr2, vt2, st2
real(DP)                                 :: w
integer                                   :: i, j, n
this%w(0) = similarity_power(this%angle,this%k)
call similarity_Coefficients(this%angle,this%w(0),this%co(0,,:),this%vt(0,:),this%vr(0,:))
call similarity_Boundary(this%angle,this%w(0),this%co(0,1,:))
call similarity_Boundary(this%angle,this%w(0),this%co(0,2,:))
this%a(0,1) = -1.0_DP
this%a(0,2) = 0.0_DP
do n = 1, this%n
    this%w(n) = this%w(0) + real(n,DP)
    call similarity_Coefficients(this%angle,this%w(n),this%co(n,,:),this%vt(n,:),this%vr(n,:))
    this%a(n,1) = -(this%a(n-1,1) * this%vt(n-1,1) + this%a(n-1,2) * this%vt(n-1,2))
    this%a(n,2) = (this%a(n-1,1) * this%vr(n-1,1) + this%a(n-1,2) * this%vr(n-1,2)) / this%w
end do
100 format(f12.7)
end subroutine innerSeries_RECURSION
!=====
subroutine innerSeries_DEALLOCATE(this)
implicit none
class(typ_innerSeries), intent(inout) :: this
if (allocated(this%co)) then
    deallocate(this%co)
end if
if (allocated(this%vt)) then
    deallocate(this%vt)
end if
if (allocated(this%vr)) then
    deallocate(this%vr)
end if
if (allocated(this%a)) then
    deallocate(this%a)
end if
if (allocated(this%w)) then
    deallocate(this%w)
end if
end subroutine innerSeries_DEALLOCATE
!=====
end module mod_innerSeries
!#####
! Copyright 2013 by Ludwig C. Nitsche
!-----
module mod_innerSeriesCheck
use mod_constants

```

```

use mod_innerSeries
use mod_stokesEq2d
implicit none
private
public :: innerSeriesCheck
type(typ_innerSeries) :: sav_a
contains
!=====
  subroutine innerSeriesCheck
  implicit none
  integer          :: angle, i, k, m, n
  real(DP), dimension(10) :: r, e
  real(DP), dimension(7,13) :: c
  real(DP)         :: s
  print*, 'innerSeriesCheck'
  print*, 'angle ?'
  read *, angle
  print*, 'k ?'
  read *, k
  print*, 'n ?'
  read *, n
  print*, 's ?'
  read *, s
  call sav_a%SetAngle(angle)
  call sav_a%SetSolution(k)
  call sav_a%SetOrder(n)
  call sav_a%SetSlip(s)
  call sav_a%Coefficients('innerSeries_Coefficients.txt')
  call sav_a%Boundary('innerSeries_Boundary' // char(48 + k) // '.txt')
  call stokesEq2d_Cartesian(innerSeriesCheck_CARTESIAN, 'innerSeries_Cartesian' // char(48 + k) // '.txt')
  call stokesEq2d_Polar   (innerSeriesCheck_POLAR   , 'innerSeries_Polar'   // char(48 + k) // '.txt')
  r( 1) = 1.0e-2_DP
  r( 2) = 2.0e-2_DP
  r( 3) = 5.0e-2_DP
  r( 4) = 1.0e-1_DP
  r( 5) = 2.0e-1_DP
  r( 6) = 5.0e-1_DP
  r( 7) = 1.0e0_DP
  r( 8) = 2.0e0_DP
  r( 9) = 5.0e0_DP
  r(10) = 1.0e1_DP
  open(unit = 20, file = 'innerSeries_Errors' // char(48 + k) // '.txt')
  write(20,100) r
  do m = 0, n
    call sav_a%SetOrder(m)
    call sav_a%SetSlip(s)
    do i = 1, 10
      e(i) = sav_a%errorPressure(r(i))
    end do
    write(20,140) m, e
  end do
  write(20,120) r
  do m = 0, n
    call sav_a%SetOrder(m)
    call sav_a%SetSlip(s)
    do i = 1, 10
      e(i) = sav_a%errorStress(r(i))
    end do
    write(20,140) m, e
  end do
end do

```

```

close(20)
100 format( 'Series errors in pressure' // ' n', 10(1x, e9.2) / '---', 10(1x, 9('-'))
120 format(// 'Series errors in stress' // ' n', 10(1x, e9.2) / '---', 10(1x, 9('-'))
140 format(i3, 110(1x, e9.2))
end subroutine innerSeriesCheck
!=====
subroutine innerSeriesCheck_CARTESIAN(arg_p,arg_f)
implicit none
real(DP), dimension(2), intent(in) :: arg_p
real(DP), dimension(0:3), intent(out) :: arg_f
call sav_a%Cartesian(arg_p,arg_f)
end subroutine innerSeriesCheck_CARTESIAN
!=====
subroutine innerSeriesCheck_POLAR(arg_r,arg_t,arg_pr,arg_vr,arg_vt,arg_st)
implicit none
real(DP), intent(in) :: arg_r, arg_t
real(DP), intent(out) :: arg_st, arg_pr, arg_vr, arg_vt
call sav_a%Polar(arg_r,arg_t,arg_pr,arg_vr,arg_vt,arg_st)
end subroutine innerSeriesCheck_POLAR
!=====
end module mod_innerSeriesCheck
!#####
! Copyright 2013 by Ludwig C. Nitsche
!-----
module mod_similarity1
use mod_constants
use mod_utilities
use mod_generalSolution
use mod_fullmat
implicit none
private
public :: similarity1_Coefficients
public :: similarity1_Boundary
public :: similarity1_Cartesian
public :: similarity1_Polar
contains
!=====
subroutine similarity1_Coefficients(arg_angle,arg_w,arg_co,arg_pr,arg_st)
implicit none
integer, intent(in) :: arg_angle
real(DP), intent(in) :: arg_w
real(DP), dimension(4,8), intent(out) :: arg_co
real(DP), dimension(4,0:1), intent(out) :: arg_pr
real(DP), dimension(4,0:1), intent(out) :: arg_st
real(DP), dimension(0:1,8) :: fp, fr, ft, fs
real(DP), dimension(0:1,8) :: gp, gr, gt, gs
real(DP), dimension(8,8) :: a
real(DP), dimension(8) :: x
real(DP) :: t1, t2
type(typ_fullmat) :: z
t1 = 0.0_DP
t2 = arg_angle * PI / 180.0_DP
call similarity1_FUNCTIONS(t1,arg_w,fp,fr,ft,fs)
call similarity1_FUNCTIONS(t2,arg_w,gp,gr,gt,gs)
a(1,:) = ft(0,:)
a(2,:) = ft(1,:)
a(3,:) = fr(0,:)
a(4,:) = fr(1,:)
a(5,:) = gt(0,:)
a(6,:) = gt(1,:)

```

```

a(7,:) = gr(0,:)
a(8,:) = gr(1,:)
call z%SetMatrix(a)
x = 0.0_DP
x(1) = 1.0_DP
call z%SolSystem(x)
arg_co(1,:) = x
arg_pr(1,0) = dot_product(x,fp(0,:))
arg_pr(1,1) = dot_product(x,fp(1,:))
arg_st(1,0) = dot_product(x,fs(0,:))
arg_st(1,1) = dot_product(x,fs(1,:))
x = 0.0_DP
x(2) = 1.0_DP
call z%SolSystem(x)
arg_co(2,:) = x
arg_pr(2,0) = dot_product(x,fp(0,:))
arg_pr(2,1) = dot_product(x,fp(1,:))
arg_st(2,0) = dot_product(x,fs(0,:))
arg_st(2,1) = dot_product(x,fs(1,:))
x = 0.0_DP
x(3) = 1.0_DP
call z%SolSystem(x)
arg_co(3,:) = x
arg_pr(3,0) = dot_product(x,fp(0,:))
arg_pr(3,1) = dot_product(x,fp(1,:))
arg_st(3,0) = dot_product(x,fs(0,:))
arg_st(3,1) = dot_product(x,fs(1,:))
x = 0.0_DP
x(4) = 1.0_DP
call z%SolSystem(x)
arg_co(4,:) = x
arg_pr(4,0) = dot_product(x,fp(0,:))
arg_pr(4,1) = dot_product(x,fp(1,:))
arg_st(4,0) = dot_product(x,fs(0,:))
arg_st(4,1) = dot_product(x,fs(1,:))
end subroutine similarity1_Coefficients
!=====
subroutine similarity1_Boundary(arg_angle,arg_w,arg_d)
implicit none
integer,          intent(in) :: arg_angle
real(DP),         intent(in) :: arg_w
real(DP), dimension(8), intent(in) :: arg_d
real(DP), dimension(0:1,8) :: fp, fr, ft, fs
real(DP), dimension(0:1,8) :: gp, gr, gt, gs
real(DP)          :: fp0, fr0, ft0, fs0
real(DP)          :: fp1, fr1, ft1, fs1
real(DP)          :: gp0, gr0, gt0, gs0
real(DP)          :: gp1, gr1, gt1, gs1
real(DP)          :: t1, t2
integer           :: a1, a2
a1 = 0
a2 = arg_angle
t1 = real(a1,DP) * PI / 180.0_DP
t2 = real(a2,DP) * PI / 180.0_DP
!
call similarity1_FUNCTIONS(t1,arg_w,fp,fr,ft,fs)
call similarity1_FUNCTIONS(t2,arg_w,gp,gr,gt,gs)
!
fs0 = dot_product(arg_d,fs(0,:))
fs1 = dot_product(arg_d,fs(1,:))

```

```

fp0 = dot_product(arg_d,fp(0,:))
fp1 = dot_product(arg_d,fp(1,:))
fr0 = dot_product(arg_d,fr(0,:))
fr1 = dot_product(arg_d,fr(1,:))
ft0 = dot_product(arg_d,ft(0,:))
ft1 = dot_product(arg_d,ft(1,:))
!
gs0 = dot_product(arg_d,gs(0,:))
gs1 = dot_product(arg_d,gs(1,:))
gp0 = dot_product(arg_d,gp(0,:))
gp1 = dot_product(arg_d,gp(1,:))
gr0 = dot_product(arg_d,gr(0,:))
gr1 = dot_product(arg_d,gr(1,:))
gt0 = dot_product(arg_d,gt(0,:))
gt1 = dot_product(arg_d,gt(1,:))
!
print 300
print 100, 'st', a1, fs1, fs0, arg_w - 1.0_DP
print 100, 'pr', a1, fp1, fp0, arg_w - 1.0_DP
print 100, 'vr', a1, fr1, fr0, arg_w
print 100, 'vt', a1, ft1, ft0, arg_w
print 200
print 100, 'st', a2, gs1, gs0, arg_w - 1.0_DP
print 100, 'pr', a2, gp1, gp0, arg_w - 1.0_DP
print 100, 'vr', a2, gr1, gr0, arg_w
print 100, 'vt', a2, gt1, gt0, arg_w
print 300
!
100 format (a, '(r,', i3, ') = [ (' f17.10, ') ln(r) + (' f17.10, ') ] r^(', f5.1, ')')
200 format ( )
300 format (79('-'))
end subroutine similarity1_Boundary
!=====
subroutine similarity1_Cartesian(arg_w,arg_d,arg_p,arg_f)
real(DP),          intent(in)  :: arg_w
real(DP), dimension(8), intent(in) :: arg_d
real(DP), dimension(2),  intent(in) :: arg_p
real(DP), dimension(0:3), intent(out) :: arg_f
real(DP)           :: r, t, pr, vr, vt, st, vx, vy
r = sqrt(dot_product(arg_p,arg_p))
t = angle(arg_p)
call similarity1_Polar(arg_w,arg_d,r,t,pr,vr,vt,st)
call PolarToCartesian (t,vr,vt,vx,vy)
arg_f = (/ pr, vx, vy, st /)
end subroutine similarity1_Cartesian
!=====
subroutine similarity1_Polar(arg_w,arg_d,arg_r,arg_t,arg_pr,arg_vr,arg_vt,arg_st)
implicit none
real(DP),          parameter    :: TOL = 1.0e-8_DP
real(DP), dimension(8), intent(in) :: arg_d
real(DP),          intent(in)  :: arg_w, arg_r, arg_t
real(DP),          intent(out) :: arg_pr, arg_vr, arg_vt, arg_st
real(DP), dimension(0:1,8)    :: fp, fr, ft, fs
real(DP)             :: fp0, fr0, ft0, fs0
real(DP)             :: fp1, fr1, ft1, fs1
real(DP)             :: lnr
if (arg_r < TOL) then
  arg_st = 0.0_DP
  arg_pr = 0.0_DP
  arg_vr = 0.0_DP

```

```

    arg_vt = 0.0_DP
  else
    call similarity1_FUNCTIONS(arg_t, arg_w, fp, fr, ft, fs)
    fs0 = dot_product(arg_d, fs(0,:))
    fs1 = dot_product(arg_d, fs(1,:))
    fp0 = dot_product(arg_d, fp(0,:))
    fp1 = dot_product(arg_d, fp(1,:))
    fr0 = dot_product(arg_d, fr(0,:))
    fr1 = dot_product(arg_d, fr(1,:))
    ft0 = dot_product(arg_d, ft(0,:))
    ft1 = dot_product(arg_d, ft(1,:))
    lnr = log(arg_r)
    arg_st = (fs1 * lnr + fs0) * arg_r**(arg_w - 1.0_DP)
    arg_pr = (fp1 * lnr + fp0) * arg_r**(arg_w - 1.0_DP)
    arg_vr = (fr1 * lnr + fr0) * arg_r**arg_w
    arg_vt = (ft1 * lnr + ft0) * arg_r**arg_w
  end if
end subroutine similarity1_Polar
=====
subroutine similarity1_FUNCTIONS(arg_t, arg_w, arg_fp, arg_fr, arg_ft, arg_fs)
  implicit none
  real(DP),          intent(in)  :: arg_t, arg_w
  real(DP), dimension(0:1,8), intent(out) :: arg_fp, arg_fr, arg_ft, arg_fs
  real(DP), dimension(12)          :: fp0, fp1, fp2
  real(DP), dimension(12)          :: fr0, fr1, fr2
  real(DP), dimension(12)          :: ft0, ft1, ft2
  real(DP), dimension(12)          :: fs0, fs1, fs2
  call generalSolution_Coeff_p(arg_t, arg_w, fp0, fp1, fp2)
  call generalSolution_Coeff_r(arg_t, arg_w, fr0, fr1, fr2)
  call generalSolution_Coeff_t(arg_t, arg_w, ft0, ft1, ft2)
  call generalSolution_Coeff_s(arg_t, arg_w, fs0, fs1, fs2)
  arg_fp(0,:) = fp0(5:12)
  arg_fp(1,:) = fp1(5:12)
  arg_fr(0,:) = fr0(5:12)
  arg_fr(1,:) = fr1(5:12)
  arg_ft(0,:) = ft0(5:12)
  arg_ft(1,:) = ft1(5:12)
  arg_fs(0,:) = fs0(5:12)
  arg_fs(1,:) = fs1(5:12)
end subroutine similarity1_FUNCTIONS
=====
end module mod_similarity1
#####
! Copyright 2013 by Ludwig C. Nitsche
!-----
module mod_similarity1Check
  use mod_constants
  use mod_similarity1
  use mod_stokesEq2d
  implicit none
  private
  public :: similarity1Check
  real(DP)          :: sav_w
  real(DP), dimension(8) :: sav_d
  contains
  =====
  subroutine similarity1Check
    implicit none
    sav_w = 2.7_DP
    sav_d(1:4) = (/ 1.37_DP, 5.76_DP, -6.32_DP, -7.98_DP /)
  end subroutine similarity1Check
  =====

```

```

sav_d(5:8) = (/ -7.62_DP, 3.17_DP, 4.51_DP, 2.89_DP /)
call stokesEq2d_Cartesian(similarity1Check_CARTESIAN,'similarity1_Cartesian.txt')
call stokesEq2d_Polar(similarity1Check_POLAR,'similarity1_Polar.txt')
end subroutine similarity1Check
!=====
subroutine similarity1Check_CARTESIAN(arg_p,arg_f)
implicit none
real(DP), dimension(2), intent(in) :: arg_p
real(DP), dimension(0:3), intent(out) :: arg_f
call similarity1_Cartesian(sav_w,sav_d,arg_p,arg_f)
end subroutine similarity1Check_CARTESIAN
!=====
subroutine similarity1Check_POLAR(arg_r,arg_t,arg_pr,arg_vr,arg_vt,arg_st)
implicit none
real(DP), intent(in) :: arg_r, arg_t
real(DP), intent(out) :: arg_pr, arg_vr, arg_vt, arg_st
call similarity1_Polar(sav_w,sav_d,arg_r,arg_t,arg_pr,arg_vr,arg_vt,arg_st)
end subroutine similarity1Check_POLAR
!=====
end module mod_similarity1Check
!#####
! Copyright 2013 by Ludwig C. Nitsche
!-----
module mod_outerSeries
use mod_constants
use mod_utilities
use mod_similarity1
use mod_outer0
use mod_outer1
implicit none
private
type, public :: typ_outerSeries
private
integer :: angle = 90
integer :: k = 0
integer :: n = 25
real(DP) :: s = 12.3_DP
real(DP), dimension(:,:,:), allocatable :: co
real(DP), dimension(:,:,:), allocatable :: pr
real(DP), dimension(:,:,:), allocatable :: st
real(DP), dimension(:,:), allocatable :: a
real(DP), dimension(:), allocatable :: w
contains
procedure :: SetAngle => outerSeries_SetAngle
procedure :: SetSolution => outerSeries_SetSolution
procedure :: SetOrder => outerSeries_SetOrder
procedure :: SetSlip => outerSeries_SetSlip
procedure :: Coefficients => outerSeries_Coefficients
procedure :: errorPressure => outerSeries_errorPressure
procedure :: errorStress => outerSeries_errorStress
procedure :: Boundary => outerSeries_Boundary
procedure :: Cartesian => outerSeries_Cartesian
procedure :: Polar => outerSeries_Polar
end type typ_outerSeries
type(typ_outer0) :: sav_outer0
type(typ_outer1), dimension(3) :: sav_outer1
contains
!=====
subroutine outerSeries_SetAngle(this,arg_angle)
implicit none

```

```

class(typ_outerSeries), intent(inout) :: this
integer,          intent(in)   :: arg_angle
this%angle = clip(arg_angle,45,180)
end subroutine outerSeries_Setangle
!=====
subroutine outerSeries_SetSolution(this,arg_k)
implicit none
class(typ_outerSeries), intent(inout) :: this
integer,          intent(in)   :: arg_k
this%k = clip(arg_k,0,1)
end subroutine outerSeries_SetSolution
!=====
subroutine outerSeries_SetOrder(this,arg_n)
implicit none
class(typ_outerSeries), intent(inout) :: this
integer,          intent(in)   :: arg_n
integer          :: n
this%n = max(arg_n,0)
n = max(this%n,1)
call outerSeries_DEALLOCATE(this)
allocate(this%co(0:n,4,8))
allocate(this%pr(0:n,4,0:1))
allocate(this%st(0:n,4,0:1))
allocate(this%a(0:n,4))
allocate(this%w(0:n))
call sav_outer0%SetAngle(this%angle)
call sav_outer1(1)%SetAngle(this%angle)
call sav_outer1(2)%SetAngle(this%angle)
call sav_outer1(3)%SetAngle(this%angle)
call sav_outer1(1)%SetSolution(1)
call sav_outer1(2)%SetSolution(2)
call sav_outer1(3)%SetSolution(3)
end subroutine outerSeries_SetOrder
!=====
subroutine outerSeries_SetSlip(this,arg_s)
class(typ_outerSeries), intent(inout) :: this
real(DP),          intent(in)   :: arg_s
integer          :: n
this%s = abs(arg_s)
call outerSeries_RECURSION(this)
end subroutine outerSeries_SetSlip
!=====
subroutine outerSeries_Coefficients(this,arg_filename)
class(typ_outerSeries), intent(in) :: this
character(len=*),      intent(in) :: arg_filename
integer          :: n
open(unit = 20, file = arg_filename)
do n = 0, this%n
    write(20,100) n, this%a(n,:)
end do
close(20)
100 format('n = ', i3, 4x, 4(1x, e17.10))
end subroutine outerSeries_Coefficients
!=====
function outerSeries_errorPressure(this,arg_r) result(arg_f)
implicit none
class(typ_outerSeries), intent(in) :: this
real(DP),          intent(in) :: arg_r
real(DP)          :: arg_f
integer          :: i

```



```

    arg_f = 0.0_DP
    do i = 1, 4
        arg_f = arg_f + this%a(this%n,i) * arg_r**this%w(this%n) / arg_r &
            * (this%pr(this%n,i,1) * log(arg_r) + this%pr(this%n,i,0))
    end do
end function outerSeries_errorPressure
!=====
function outerSeries_errorStress(this,arg_r) result(arg_f)
implicit none
class(typ_outerSeries), intent(in) :: this
real(DP),                intent(in) :: arg_r
real(DP)                  :: arg_f
integer                   :: i
arg_f = 0.0_DP
do i = 1, 4
    arg_f = arg_f + this%a(this%n,i) * arg_r**this%w(this%n) / arg_r &
        * (this%st(this%n,i,1) * log(arg_r) + this%st(this%n,i,0))
end do
end function outerSeries_errorStress
!=====
subroutine outerSeries_Boundary(this,arg_filename)
implicit none
class(typ_outerSeries), intent(in) :: this
character(len=*),       intent(in) :: arg_filename
integer                 :: i, iMax
real(DP)                :: r, rMax, rMin
real(DP)                :: pr, vr, vt, st
real(DP)                :: e1, e2, f1, f2
real(DP)                :: error1, error2, distance, cutoff
cutoff = 1.0e-2_DP
rMin = 1.0e1_DP
rMax = 1.0e4_DP
iMax = 15
error1 = 0.0_DP
error2 = 0.0_DP
distance = 0.0_DP
open(unit = 20, file = arg_filename)
do i = 0, iMax
    r = exp(log(rMin) + log(rMax / rMin) * real(i,DP) / real(iMax,DP))
    call outerSeries_Polar(this,r,0.0_DP,pr,vr,vt,st)
    f1 = outerSeries_errorPressure(this,r)
    f2 = outerSeries_errorStress(this,r)
    e1 = pr + vt
    e2 = st - vr / this%s
    write(20,100) r, pr, vt, e1, f1, st, vr / this%s, e2, f2
    if (abs(e1 - f1) > error1) then
        error1 = abs(e1 - f1)
    end if
    if (abs(e2 - f2) > error2) then
        error2 = abs(e2 - f2)
    end if
    if (max(abs(e1),abs(e2)) > cutoff) then
        distance = r
    end if
end do
close(20)
print 200, error1, error2, distance

100 format(e12.5, 2(8x, e15.8, 1x, e15.8, 8x, e12.5, 1x, e12.5))
200 format('outerSeries: Solution' / &

```

```

        5x, 'Error1 = ', e12.5 / 5x, 'Error2 = ', e12.5 / &
        5x, 'Distance = ', e12.5 /)
    end subroutine outerSeries_Boundary
!=====
    subroutine outerSeries_Cartesian(this,arg_p,arg_f)
    class(typ_outerSeries), intent(in) :: this
    real(DP), dimension(2), intent(in) :: arg_p
    real(DP), dimension(0:3), intent(out) :: arg_f
    real(DP), dimension(0:3) :: f
    integer :: i, n
    call sav_outer0%Cartesian(arg_p,f)
    arg_f = this%a(0,1) * f
    if (this%n > 0) then
        do i = 1, 3
            call sav_outer1(i)%Cartesian(arg_p,f)
            arg_f = arg_f + this%a(1,i) * f
        end do
    end if
    do n = 2, this%n
        do i = 1, 4
            call similarity1_Cartesian(this%w(n),this%co(n,i,:),arg_p,f)
            arg_f = arg_f + this%a(n,i) * f
        end do
    end do
end subroutine outerSeries_Cartesian
!=====
    subroutine outerSeries_Polar(this,arg_r,arg_t,arg_pr,arg_vr,arg_vt,arg_st)
    implicit none
    class(typ_outerSeries), intent(in) :: this
    real(DP), intent(in) :: arg_r, arg_t
    real(DP), intent(out) :: arg_st, arg_pr, arg_vr, arg_vt
    real(DP) :: st, pr, vr, vt, cs, cp
    integer :: i, n
    arg_pr = 0.0_DP
    arg_vr = 0.0_DP
    arg_vt = 0.0_DP
    arg_st = 0.0_DP
    call sav_outer0%Polar(arg_r,arg_t,pr,vr,vt,st)
    arg_pr = this%a(0,1) * pr
    arg_vr = this%a(0,1) * vr
    arg_vt = this%a(0,1) * vt
    arg_st = this%a(0,1) * st
    if (this%n > 0) then
        do i = 1, 3
            call sav_outer1(i)%Polar(arg_r,arg_t,pr,vr,vt,st)
            arg_pr = arg_pr + this%a(1,i) * pr
            arg_vr = arg_vr + this%a(1,i) * vr
            arg_vt = arg_vt + this%a(1,i) * vt
            arg_st = arg_st + this%a(1,i) * st
        end do
    end if
    do n = 2, this%n
        do i = 1, 4
            call similarity1_Polar(this%w(n),this%co(n,i,:),arg_r,arg_t,pr,vr,vt,st)
            arg_pr = arg_pr + this%a(n,i) * pr
            arg_vr = arg_vr + this%a(n,i) * vr
            arg_vt = arg_vt + this%a(n,i) * vt
            arg_st = arg_st + this%a(n,i) * st
        end do
    end do
end do

```

```

end subroutine outerSeries_Polar
!=====
subroutine outerSeries_RECURSION(this)
implicit none
class(typ_outerSeries), intent(inout) :: this
real(DP) :: pr0, vr0, vt0, st0
real(DP), dimension(3,0:1) :: pr1, vr1, vt1, st1
real(DP), dimension(0:1) :: pr, st
integer :: i, j, n
!
this%w(0) = 0.0_DP
call sav_outer0%Boundary(pr0,vr0,vt0,st0)
if (this%k == 0) then
  this%a(0,1) = 1.0_DP
else
  this%a(0,1) = 0.0_DP
end if
this%a(0,2) = 0.0_DP
this%a(0,3) = 0.0_DP
this%a(0,4) = 0.0_DP
this%pr(0,1,:) = (/ pr0, 0.0_DP /)
this%pr(0,2,:) = 0.0_DP
this%pr(0,3,:) = 0.0_DP
this%pr(0,4,:) = 0.0_DP
this%st(0,1,:) = (/ st0, 0.0_DP /)
this%st(0,2,:) = 0.0_DP
this%st(0,3,:) = 0.0_DP
this%st(0,4,:) = 0.0_DP
!
this%w(1) = -1.0_DP
call sav_outer1(1)%Boundary(pr1(1,:),vr1(1,:),vt1(1,:),st1(1,:))
call sav_outer1(2)%Boundary(pr1(2,:),vr1(2,:),vt1(2,:),st1(2,:))
call sav_outer1(3)%Boundary(pr1(3,:),vr1(3,:),vt1(3,:),st1(3,:))
this%a(1,1) = -this%a(0,1) * this%pr(0,1,0)
this%a(1,2) = this%a(0,1) * this%st(0,1,0) * this%s
if (this%k == 0) then
  this%a(1,3) = 0.0_DP
else
  this%a(1,3) = 1.0_DP
end if
this%a(1,4) = 0.0_DP
this%pr(1,1,:) = pr1(1,:)
this%pr(1,2,:) = pr1(2,:)
this%pr(1,3,:) = pr1(3,:)
this%pr(1,4,:) = 0.0_DP
this%st(1,1,:) = st1(1,:)
this%st(1,2,:) = st1(2,:)
this%st(1,3,:) = st1(3,:)
this%st(1,4,:) = 0.0_DP
!
do n = 2, this%n
  this%w(n) = -real(n,DP)
  call similarity1_Coefficients(this%angle,this%w(n),this%co(n,:,:),this%pr(n,:,:),this%st(n,:,:))
  pr = 0.0_DP
  st = 0.0_DP
  do i = 1, 4
    do j = 0, 1
      pr(j) = pr(j) + this%a(n-1,i) * this%pr(n-1,i,j)
      st(j) = st(j) + this%a(n-1,i) * this%st(n-1,i,j)
    end do
  end do
end do

```

```

        end do
        this%a(n,1) = -pr(0)
        this%a(n,2) = -pr(1)
        this%a(n,3) = st(0) * this%s
        this%a(n,4) = st(1) * this%s
    end do
100 format('Order: ', i3)
    end subroutine outerSeries_RECURSION
!=====
    subroutine outerSeries_DEALLOCATE(this)
    implicit none
    class(typ_outerSeries), intent(inout) :: this
    if (allocated(this%co)) then
        deallocate(this%co)
    end if
    if (allocated(this%pr)) then
        deallocate(this%pr)
    end if
    if (allocated(this%st)) then
        deallocate(this%st)
    end if
    if (allocated(this%a)) then
        deallocate(this%a)
    end if
    if (allocated(this%w)) then
        deallocate(this%w)
    end if
    end subroutine outerSeries_DEALLOCATE
!=====
end module mod_outerSeries
!#####
! Copyright 2013 by Ludwig C. Nitsche
!-----
module mod_outerSeriesCheck
use mod_constants
use mod_outerSeries
use mod_stokesEq2d
implicit none
private
public :: outerSeriesCheck
type(typ_outerSeries) :: sav_a
contains
!=====
    subroutine outerSeriesCheck
    implicit none
    integer          :: angle, i, k, m, n
    real(DP), dimension(10) :: r, e
    real(DP), dimension(7,13) :: c
    real(DP)          :: s
    print*, 'outerSeriesCheck'
    print*, 'angle ?'
    read *, angle
    print*, 'k ?'
    read *, k
    print*, 'n ?'
    read *, n
    print*, 's ?'
    read *, s
    call sav_a%SetAngle(angle)
    call sav_a%SetSolution(k)

```

```

call sav_a%SetOrder(n)
call sav_a%SetSlip(s)
call sav_a%Coefficients('outerSeries_Coefficients.txt')
call sav_a%Boundary('outerSeries_Boundary' // char(48 + k) // '.txt')
call stokesEq2d_Cartesian(outerSeriesCheck_CARTESIAN,'outerSeries_Cartesian' // char(48 + k) // '.txt')
call stokesEq2d_Polar (outerSeriesCheck_POLAR , 'outerSeries_Polar' // char(48 + k) // '.txt')
r( 1) = 1.0e1_DP
r( 2) = 2.0e1_DP
r( 3) = 5.0e1_DP
r( 4) = 1.0e2_DP
r( 5) = 2.0e2_DP
r( 6) = 5.0e2_DP
r( 7) = 1.0e3_DP
r( 8) = 2.0e3_DP
r( 9) = 5.0e3_DP
r(10) = 1.0e4_DP
open(unit = 20, file = 'outerSeries_Errors' // char(48 + k) // '.txt')
write(20,100) r
do m = 0, n
  call sav_a%SetOrder(m)
  call sav_a%SetSlip(s)
  do i = 1, 10
    e(i) = sav_a%errorPressure(r(i))
  end do
  write(20,140) m, e
end do
write(20,120) r
do m = 0, n
  call sav_a%SetOrder(m)
  call sav_a%SetSlip(s)
  do i = 1, 10
    e(i) = sav_a%errorStress(r(i))
  end do
  write(20,140) m, e
end do
close(20)
100 format( 'Series errors in pressure' // ' n', 10(1x, e9.2) / '---', 10(1x, 9('-')))
120 format(// 'Series errors in stress' // ' n', 10(1x, e9.2) / '---', 10(1x, 9('-')))
140 format(i3, 110(1x, e9.2))
end subroutine outerSeriesCheck
!=====
subroutine outerSeriesCheck_CARTESIAN(arg_p,arg_f)
implicit none
real(DP), dimension(2), intent(in) :: arg_p
real(DP), dimension(0:3), intent(out) :: arg_f
call sav_a%Cartesian(arg_p,arg_f)
end subroutine outerSeriesCheck_CARTESIAN
!=====
subroutine outerSeriesCheck_POLAR(arg_r,arg_t,arg_pr,arg_vr,arg_vt,arg_st)
implicit none
real(DP), intent(in) :: arg_r, arg_t
real(DP), intent(out) :: arg_st, arg_pr, arg_vr, arg_vt
call sav_a%Polar(arg_r,arg_t,arg_pr,arg_vr,arg_vt,arg_st)
end subroutine outerSeriesCheck_POLAR
!=====
end module mod_outerSeriesCheck
!#####
! Copyright 2013 by Ludwig C. Nitsche
!-----
module mod_check

```

```
use mod_outer1Check
use mod_innerBuildCheck
use mod_outerBuildCheck
use mod_innerSeriesCheck
use mod_outerSeriesCheck
use mod_similarityCheck
use mod_similarity1Check
implicit none
private
public :: check
contains
!=====
  subroutine check
    call outer1Check
    call innerBuildCheck
    call outerBuildCheck
    call innerSeriesCheck
    call outerSeriesCheck
    call similarityCheck
    call similarity1Check
  end subroutine check
!=====
end module mod_check
!#####
```
